# Supplementary material
Source: PubMed Central journal article supplement (PMC3303602)
Supplement: NIHMS361475-supplement-supplement_1.pdf [file NIHMS361475-supplement-supplement_1.pdf]

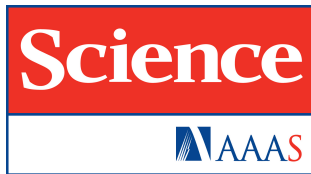

## Supporting Online Material for

Diet drives convergence in gut microbiome functions across mammalian  
phylogeny and within humans

Brian D. Muegge, Justin Kuczynski, Dan Knights, Jose C. Clemente, Antonio González,  
Luigi Fontana, Bernard Henrissat, Rob Knight, and Jeffrey I. Gordon \*

\*To whom correspondence should be sent: [jgordon@wustl.edu](mailto:jgordon@wustl.edu)

**This PDF file includes:**

Materials and Methods  
Figs. S1 to S3  
Tables S1 to S11  
References

## Supporting Online Materials

### Interactive Plots on the Web

The kinemage files used to generate Figure 1 have been posted on our lab website (19), together with links for panels in that figure. Clicking the links will open java applets that contain an interactive, labeled PCoA plot of the Procrustes analysis used to generate the panel. The viewer can rotate the plot in 3-dimensions, and can also view the first 10 principal coordinate axes. The coloring and naming conventions online are consistent with Figure 1.

## Materials and Methods

### Subjects

**Table S1** lists the mammalian species included in this study and their diet group. Further details about their diets, dietary group classification, plus methods used to recover and store fecal samples have been published previously (1). Eighteen members of the Calorie Restriction Society were recruited for the present study using a procedure approved by the Washington University Human Studies Committee. The volunteers had practiced calorie restriction for an average of 7.6 yrs (range 3.5-21 years). The average age of the study cohort was  $59.6 \pm 10.6$  years and their body mass index was  $19.4 \pm 1.3$  kg/m<sup>2</sup> (mean  $\pm$  S.D.). None of these individuals had consumed antibiotics in the four months prior to enrollment and none had a history of gastrointestinal disorders. Each participant provided a fecal specimen that was frozen at -20°C within 30 min after its production. Samples were maintained at this temperature until they were received (within 24h) at a biospecimen repository where they were anonymized and stored at -80°C prior to metagenomic analyses. The participants kept detailed diet records for four days prior to fecal collection. A dietician analyzed these diet records to quantify macro- and micronutrient content using the Nutrition Data System for Research (NDS-R; version 4.03\_31) (16).

### Isolation of Fecal DNA and Multiplex Pyrosequencing

All mammalian and human samples were subjected to a common protocol for DNA extraction. Fecal samples were pulverized with a mortar and pestle at -80°C. A 500 mg aliquot of each frozen pulverized sample was re-suspended in a solution containing 500µL of extraction buffer [200mM Tris (pH 8.0), 200mM NaCl, 20mM EDTA], 210µL of 20% SDS, 500µL of phenol:chloroform:isoamyl alcohol (25:24:1) and 500µL of a slurry of 0.1-mm diameter zirconia/silica beads. Cells were then mechanically disrupted using a bead beater (Biospec, maximum setting; 3 min at room temperature), followed by extraction with phenol:chloroform:isoamyl alcohol and precipitation with isopropanol. An aliquot of the DNA was used for PCR amplification and sequencing of bacterial 16S rRNA genes. ~330bp amplicons, spanning variable region 2 (V2) of the gene were generated by using (i) modified primer 8F (5'-GCCTTGCCAGCCCGCTCAG**TCAGAGTTTGATCCTGGCTCAG**-3') which consists of 454 FLX Amplicon primer B (underlined), a two base linker (bold) and the universal

bacterial primer 8F (*italics*) and (ii) modified primer 338R (5' GCCTCCCTCGCGCCATCAGNNNNNNNNNNNCATGCTGCCTCCCGTAGGAGT 3') which contains 454 FLX Amplicon primer A (underlined), a sample specific, error correcting 12-mer barcode (N's), a two base linker (**bold**), and the bacterial primer 338R (*italics*). Three replicate polymerase chain reactions were performed for each fecal DNA sample: each 20-mL reaction contained 100 ng of gel-purified DNA (Qiaquick, QIAGEN), 8 ml 2.5X HotMaster PCR Mix (Eppendorf) and 0.2  $\mu$ M of each primer. PCR conditions consisted of an initial denaturation step performed at 95 °C for 2 min, followed by 30 cycles of denaturation (95°C, 20 s), annealing (52°C, 20 s) and amplification (65°C, 1 min). Amplicons generated from each set of three reactions were subsequently pooled and purified using Ampure magnetic purification beads (Agencourt). The amount of DNA was quantified using Picogreen (Invitrogen), and equimolar amounts of barcoded samples were pooled for each subsequent multiplex 454 FLX pyrosequencer run.

For multiplex shotgun 454 FLX pyrosequencing, each fecal community DNA sample was randomly fragmented by nebulization to 400-800 bp (FLX standard) or 500-800 bp (FLX Titanium), and then labeled with a distinct MID (Multiplex Identifier; Roche) using the MID manufacturer's protocol (general library preparation for FLX standard, Rapid Library preparation for FLX Titanium). Equivalent amounts of up to 12 MID-labeled samples were pooled prior to each pyrosequencer run (454 FLX and Titanium chemistry).

### 16S rRNA Data Processing and Analysis

16S rRNA amplicon sequences were processed using the QIIME (v1.1) suite of software tools (20); fasta files, quality files and a mapping file indicating the sequence of the 12 nt barcode that corresponded to each sample were used as inputs. QIIME bins pyrosequencer reads by samples according to their barcode, de-noises pyrosequencer data (21), and classifies reads into OTUs on the basis of sequence similarity [e.g., species level phylotypes share  $\geq 97\%$  identity (ID)]. QIIME builds a *de novo* taxonomic tree of the sequences based on their similarity and creates a table of samples versus OTUs that can be used, together with the tree, to calculate alpha and beta diversity. Reads were aligned using PyNAST, and chimeric OTUs were removed using the ChimeraSlayer program (22). Procrustes analysis and network analysis were also performed in QIIME, using code made available in release 1.2.0. The network analysis was visualized using Cytoscape v2.6.3 (23), and the nodes and edges were placed using Cytoscape's spring-embedded algorithm.

Taxonomic assignments were made using SILVA-VOTE, an algorithm designed for improved accuracy in taxonomic assignments of V2 16S rRNA reads. Briefly, a non-redundant reference database of 34,181 bacterial 16S rRNA V2 regions was created by clustering the Silva database (release 102). Taxonomic assignment was made at each taxonomic level if more than 75% of the sequences in the cluster had an identical designation at that level (otherwise, the level was designated "unknown"). A representative sequence from each QIIME-identified OTU was compared by BLAST against this custom database, retaining hits with  $e\text{-value} \leq 10^{-30}$ . All BLAST hits within 10% of the best score (up to 100 hits) were used to generate a taxonomic assignment at each taxonomic level. If greater than 50% of the hits shared a designation, this annotation

was assigned to the OTU. Otherwise, the OTU was noted as “nonidentified” at that level. Note that sequences were binned into OTUs with  $\geq 97\%$  sequence identity in lane-masked V2 regions. In accord with common convention (24), when 97%ID OTUs had identical taxonomic assignments, they were binned as a single ‘species-level phylotype’. When 97%ID OTUs were assigned to the same bacterial genus, they were treated as a single ‘genus-level phylotype’.

### Shotgun Sequencing Data Processing and Annotation

Metagenomic data was annotated using custom Perl scripts. Shotgun reads were filtered using custom Perl scripts and publicly available software to remove (i) all reads less than 60 bases in length, (ii) reads with degenerate bases (N’s), (iii) all duplicates (a known artifact of pyrosequencing), defined as sequences whose initial 20 nucleotides are identical and that share an overall identity of  $>97\%$  throughout the length of the shortest read (25) and (iv) in the case of human fecal DNAs from the calorically restricted individuals, all sequences with significant similarity to human reference genomes (BLASTN with e-value  $\leq 10^{-5}$ , bitscore  $\geq 50$ , percent identity  $\geq 75\%$ ) to ensure the continued anonymity of samples.

Searches against the KEGG (version 52) and MEROPS (release 9.1) databases were carried out with BLASTX. A sequence read was annotated as the best hit in the database if (i) the E-value was  $\leq 10^{-5}$ , (ii) the bit score was  $\geq 50$ , and (iii) the alignment was at least 50% identical between query and subject. In the event that two entries in the database had equivalent BLAST scores as the best hit, the read was annotated with both entries. The KO, E.C., and KEGG Pathways associated with each KEGG sequence were determined using the “ko” file provided by KEGG. Reads were annotated against the CAZy database using procedures described previously (26). For each functional annotation schema, statistical analysis was performed on a matrix containing the count of annotated reads in each sample; e.g., for the KEGG KO data, the matrix contained the list of all possible KOs in the rows of the first column and the sample names in the column headers. The value in each “cell” of the matrix was the number of times that KO was detected as the best BLAST hit of a shotgun read from the sample. All dissimilarity metrics and related calculations were generated with QIIME. For every functional data type, an evenly rarefied matrix of functional assignments was created, a distance matrix using the Bray-Curtis metric was calculated, and results were visualized with Principal Coordinates and Procrustes Analysis.

### Taxonomic Composition of Shotgun Sequencing Data

The taxonomic distribution of metagenomic reads was determined using version 3.9 of MEGAN (6). Metagenomic reads were searched against the NCBI non-redundant protein database with BLASTX. We used the additional BLAST parameter  $-F$  “*m S*” as suggested by the authors of the software. The search results were processed in MEGAN with default parameters to generate the taxonomic profile for each sample.

### Detecting Differences in E.C. Abundance and Amino Acid Metabolism

E.C. analysis comparing the microbiomes of herbivores and carnivores was implemented with version 1.0.3 of Shotgun Functionalize R (11). As described in the main text, 495 E.C.’s were identified with significantly different relative abundance



between carnivore and herbivore microbiomes, using a Benjamini-Hochberg adjusted p-value of 0.001 as our threshold for significance. These E.C.'s were mapped onto KEGG metabolic pathways and inspected visually. For every amino acid, biosynthetic and degradative reaction pathways were identified using both KEGG annotations and the experimentally confirmed metabolic information collated in the MetaCyc database (27, 28). For every significantly different E.C. that was detected in a major amino acid biosynthetic or catabolic reaction, the relative abundance of the E.C. in the microbiomes was plotted. The objective was to eliminate statistically significant results from the final analysis if there were not a sufficient number of annotations for biological confidence. The following statistically significant E.C.s were not included in the summary analysis: (i) E.C.2.1.4.1 (glycine amidinotransferase) was found in only two microbiomes with low abundance (four total assignments in Bush Dog, two total assignments in Hyena), and (ii) E.C.2.6.1.57 (aromatic amino-acid transferase) which was found in only 7 microbiomes with low abundance (maximum of 15 assignments in Polar Bear, median of two assignments). The results of this analysis are summarized in **Table S6**. For every amino acid, E.C.s detected in biosynthetic or degradative reactions are noted, as well as reversible reactions where likely direction cannot be determined based on available information.

#### Using Procrustes Analysis to Test whether the Functional Properties of a Microbiome can be Predicted from the Bacterial Species

Procrustes analysis, named after the son of the Greek god Poseidon who fit unsuspecting travelers to a fixed-size bed by stretching them or removing their feet, is a technique for comparing the relative positions of points in two multivariate datasets. The method was first introduced by Hurley and Cattell (7), then generalized by Gower (8), for comparing psychometric datasets. The method has since been employed in macroecology (29, 30), and in a recent report used to compare datasets obtained from different regions of the same 16S rRNA sequence (31). We used the implementation of Procrustes analysis in the open-source QIIME microbial community analysis pipeline (20), built using the PyCogent libraries (32) and the Python programming language. As noted in the main text, this procedure yields a measure of fit,  $M^2$ , which is the sum of squared distances between corresponding data points after the transformation. The significance of the association is obtained by a Monte Carlo procedure in which the point labels are randomized,  $M^2$  is recomputed, and the  $M^2$  value of the actual pair of datasets is compared to the empirical distribution of  $M^2$  values observed for the permuted datasets. Because  $M^2$  depends on the sample size and the structure of the data,  $M^2$  values typically cannot be directly compared between datasets, and the statistical significance must be computed for each pair of datasets separately. In these studies, we used 1,000 replicates for calculating P-values.

We applied the Bray-Curtis distance metric to the functional data to obtain PCoA coordinates for comparison with the 16S rRNA data. We also tested additional qualitative (Jaccard) and quantitative (Canberra, Gower) distance metrics on the KO data. All of these distance metrics led to the same essential conclusion; the agreement between the weighted UniFrac distances and the KO distance matrix was significant over the first three dimensions of the Procrustes plot ( $p < 0.05$ ).

### Assessing Clustering Using the Monte Carlo Procedure

Monte Carlo simulations allow researchers to directly determine the probability of obtaining a result more extreme than the observed metric with random sampling of the data. Importantly, this test makes no *a priori* assumptions of the underlying structure of the data (e.g. a parametric distribution) and can thus be powerfully deployed with a range of experimental results. To assess sample clustering by diet, we computed the t-statistic of the UniFrac distances of 16S rRNA data and (separately) the Bray-Curtis distances of KO data, comparing the average distance between the fecal bacterial communities of herbivores to the average distance between carnivore communities. This t-statistic was treated as the “observed” result. Then, the pairwise distance matrix was randomly permuted a set number of times by shuffling the sample labels; in this study, we always performed 1,000 independent permutations. For each permutation, the t-statistic was recalculated using the new permuted labels. The distribution of the t-test statistic for the permutations was compared to the “observed” metric from the real data. The fraction of times a permutation resulted in a metric more extreme than the observed metric is the p-value, the probability that the observed result could have arisen by chance from the underlying data. For example, if 11 of the 1,000 random permutations comparing the average UniFrac distance of herbivore fecal bacterial communities to the average UniFrac distance of carnivore communities had a t-statistic more extreme than the actual observed statistic, the reported p-value would be 11/1000, or 0.011. All Monte Carlo simulations were implemented using QIIME scripts. The same procedure was employed to assess the clustering of conspecific samples, here comparing unweighted and weighted UniFrac distances between animals of the same species to distances between animals of different species.

### Regression Analysis of Data Obtained from Human Subjects

Linear regression was carried out using the R statistical software package with a simple linear model (33). Principal Coordinates were generated using QIIME as described previously for the 16S rRNA OTU data and functional KO data using the Bray-Curtis distance metric, and for the 16S rRNA data using the weighted and unweighted UniFrac distances. Principal Coordinates for the other types of functional annotation were calculated but not included in linear regression model because they had a high Pearson correlation coefficient with the KO Principal Coordinates and thus did not represent independent response variables (E.C correlation=0.97, CAZyme correlation=0.87, peptidase correlation=0.73).

For each individual, the average daily intake of carbohydrates, proteins, and insoluble fiber was calculated based on the dietary records from the four days preceding fecal sample donation. The position for each calorie-restricted individual’s gut bacterial community along Principal Coordinate 1 was regressed against each of the three dietary components using a simple linear model. The p-value resulting from the analysis was multiplied by three to adjust for the multiple hypotheses tested (Bonferroni adjustment). We also implemented a multiple linear regression using all three dietary components and their interactions as explanatory variables, with the Principal Coordinate positions as the response variable. We used backwards stepwise selection to remove non-significant terms from the model. In no case did a mixed model generate significant interactions beyond the simple linear models tested previously.

The average daily calories consumed by our cohort ranged from 1207-2551 kCal/day (mean 1673, standard deviation 395 kCal/day). We regressed total kilocalories consumed against the PC1 coordinate of our samples for all data categories (16S rRNA and functional data). After correcting for multiple-hypothesis testing, total calories were not significantly associated with any of these categories ( $p > 0.05$ ).

## Results

### Prediction of Community Functional Profiles from Species Assemblage Data using a Nearest-Neighbor Model

As noted in the main text, the strong correlation between bacterial 16S rRNA and functional profiles made us wonder if the functional configuration of a microbiome could be predicted from its 16S rRNA sequences. To test this idea, we developed a nearest-neighbor model. For a given sample, we predicted its functional composition to be the same as that sample's nearest neighbor (using the weighted UniFrac distance comparison of 16S rRNA data). To assess the quality and significance of these predictions, we compared the average root mean squared error (RMSE) of our model to the average RMSE for one million Monte Carlo trials where each sample's nearest neighbor was chosen at random from the remaining samples. The UniFrac nearest neighbor generated a significantly better functional prediction than a random neighbor for all four types of functional; for KOs, E.C.s, peptidases, and CAZymes, no permutation in the one million trials had a lower RMSE than the UniFrac prediction ( $p=0$ ). Using the unweighted UniFrac distances also led to predicted functional profiles that were significantly better than would be expected by chance (KOs,  $p=0$ ; E.C.s,  $p=0$ ; proteases,  $p=0.000252$ ; CAZymes,  $p=0$ ).

### Phylogenetic Congruence Testing

We examined the congruence between host phylogeny and the presence of bacterial taxa or particular enzymatic (or other protein) functions in host microbiomes by comparing host phylogeny to both the OTUs and KOs present in the fecal samples. We first generated a table of each OTU's or KO's presence or absence in each sample, and selected a number of sequences (without replacement) from each sample's sequences to avoid biases associated with uneven sequencing effort among samples (we selected 1,000 bacterial 16S rRNA sequences from each sample for the OTU analysis, and 5,000 assigned shotgun sequences for the KO analysis). We then eliminated OTUs or KOs present in only one sample, as they were not useful for assessing the congruence between fecal microbiomes and host phylogeny. We then searched for OTUs or KOs that were present in all members of any distinct monophylogenetic lineage and absent in all other samples included in this study. We compared this result to the results obtained on a randomized host phylogeny where the samples we obtained were associated with randomly chosen tips of the host phylogeny. To summarize the results, we grouped OTUs with assignments to identical bacterial genera, and looked for bacterial genera enriched for OTUs matching the mammalian phylogeny. Of the 198 different genera assignments detected in the subsampled OTU dataset, three (*Prevotella*, *Barnesiella*, and *Bacteroides*) were found to be significantly enriched in matching OTUs (see main text;  $p < 0.05$  relative

to a binomial distribution using the overall abundance of matching OTUs). OTUs that lacked a genera assignment were not reported when identifying bacterial genera congruent with mammalian phylogeny. Of the 668 OTUs not assigned to a named genera, 29 (4%) matched a monophyletic group in the mammalian tree, a similar proportion found in the genus-assigned OTUs.

To account for OTUs and functions whose presence/absence pattern did not exactly match a monophyletic group of mammals, we performed a test for increased presence within a monophyletic group relative to the expected value given the overall abundance of the OTU or function over all samples, using a binomial distribution. Categorizing these OTUs into genera as before, *Prevotella*, *Barnesiella*, and *Bacteroides* were significantly enriched for OTUs whose presence was congruent with the mammalian phylogeny, as well as *Ureaplasma*, *Paludibacter* and *Pedobacter*. Employing this method, we found 90 KOs, 2 CAZymes (of 119 tested), and 1 (of 274 tested) proteases congruent with host phylogeny.

Additionally, we employed the method of Ochman *et. al.* (34) as another test for co-phylogeny. Their study examined four wild primates species and their fecal microbiota, and created a maximum parsimony tree of the gut communities using a character matrix of bacterial species normalized abundances that was compared to the primate phylogeny (as determined by mitochondrial DNA sequence). To implement their approach, we used MESQUITE rather than PAUP for parsimony inference and eliminated bacterial taxa that appeared in only a single sample (non-parsimony-informative sites). We also tried a variety of parsimony variants (ordered states based on discretized z-scores, with SPR and NNI heuristics for tree search). We were able to reproduce their results for the four primate species using their source data. However, when applied to our larger mammalian tree of 33 species, we did not see an overall match between the host tree and the parsimony tree inferred from fecal bacterial communities, providing further evidence supporting our conclusion that the distribution of bacterial species does not mirror host phylogeny over the whole of the mammalian tree. We did not sample any one closely related clade with sufficient density to perform extensive tests of whether the bacterial community signal Ochman and coworkers identified dissipates once a particular evolutionary depth is reached.

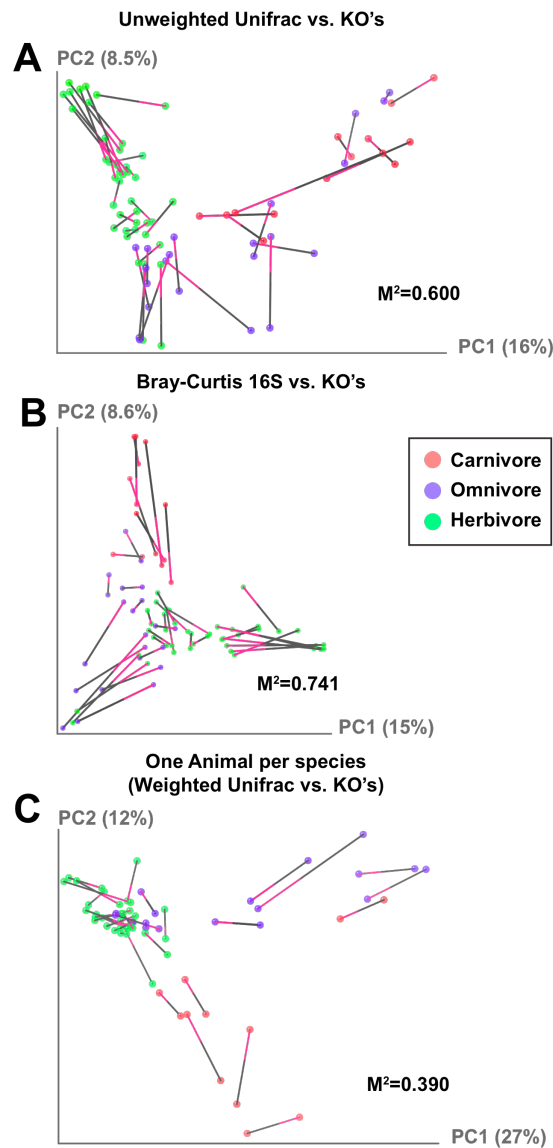

**Fig. S1.**

Procrustes analysis is robust to a variety of computational approaches. Procrustes analysis of 16S rRNA sequences (weighted UniFrac, unweighted UniFrac, OTU counts) against KO annotation of shotgun pyrosequencing reads. Every sphere represents a single mammalian fecal community and is colored by host diet. The black end of each line connects to the 16S data for the sample, while the orange end is connected to the functional annotation data. The fit of each Procrustes transformation over the first three dimensions, is reported as the  $M^2$  value. (A) Procrustes analysis of 16S rRNA data (unweighted UniFrac) against KEGG Orthology (KO) groups. (B) Procrustes analysis of OTU counts (Bray Curtis metric) against KOs. (C) Procrustes analysis of 16S rRNA data (weighted UniFrac) against KOs, using only one animal sample from each of the 33 mammalian species.

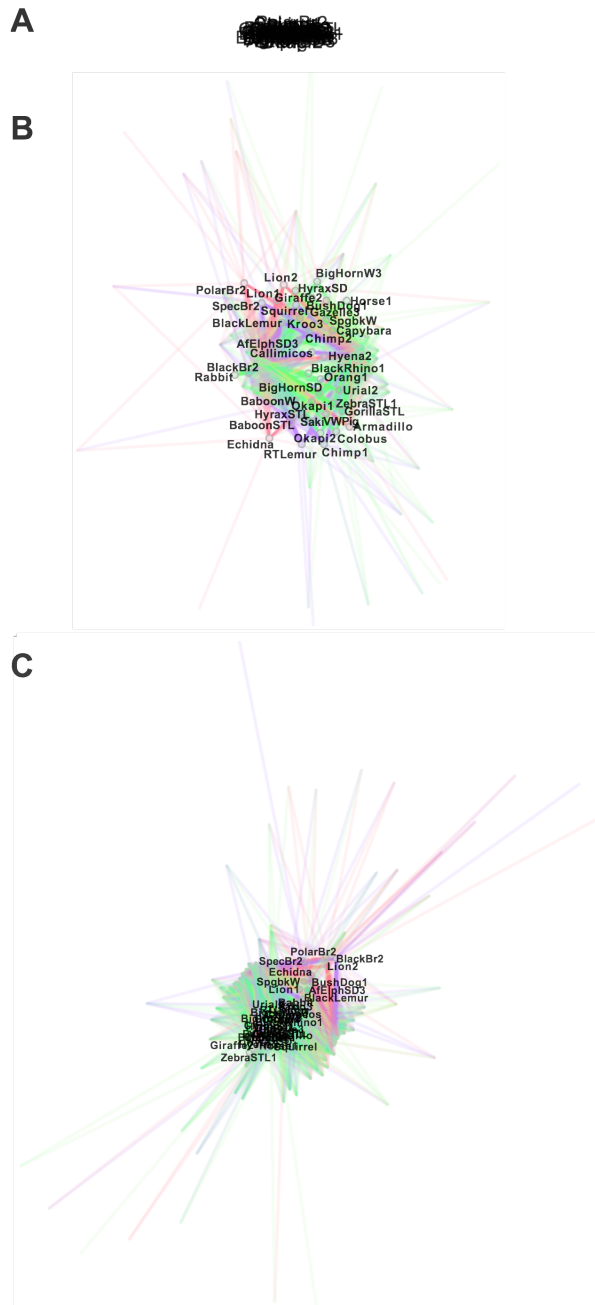

**Fig. S2.**

Bipartite network analysis. **(A)** Close-up of animal node labels for KO bipartite graph from **Fig. 2B** in main text. **(B-C)** Bipartite network diagrams of evenly sampled CAZymes [glycoside hydrolases] **(B)** or peptidases **(C)** Labeled circles (nodes) denote animal hosts, and are colored by host diet. Lines (edges) radiating from the host nodes connect to microbiome gene nodes representing a single glycoside hydrolase or peptidase found in the host fecal microbiome.

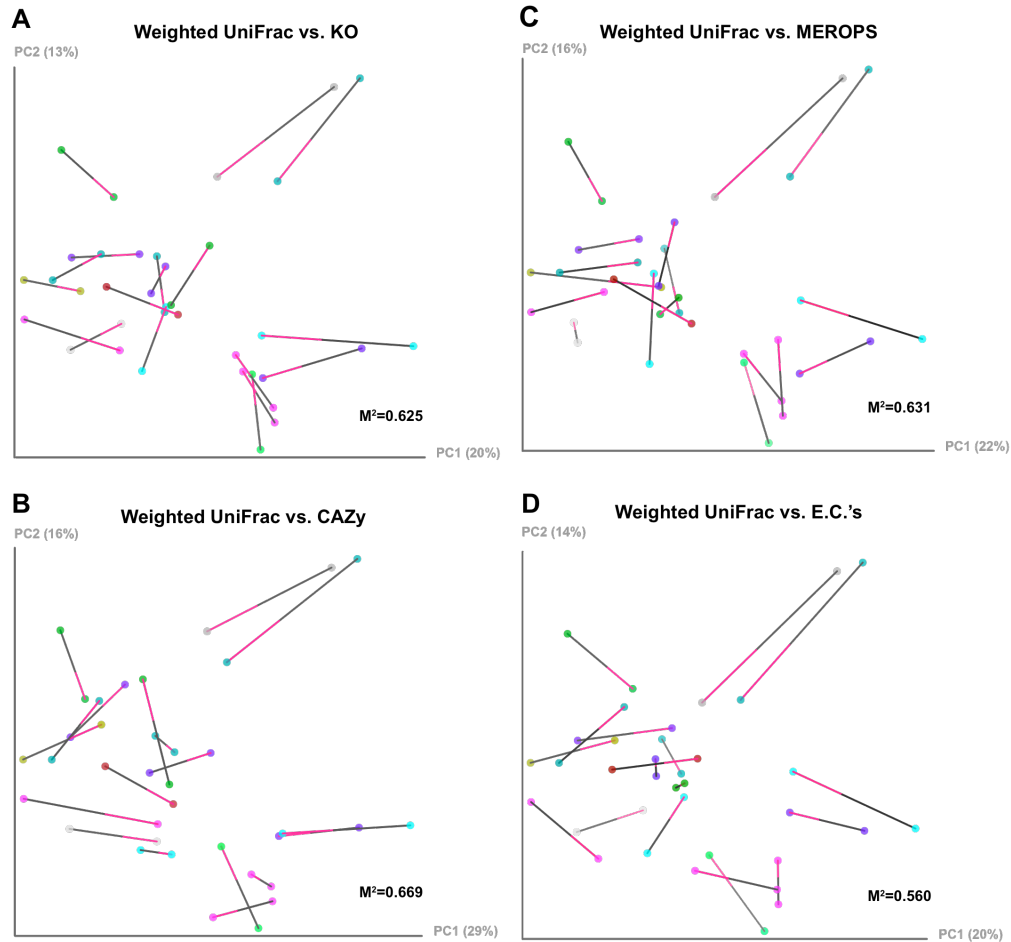

**Fig. S3.**

Procrustes analysis shows that the bacterial lineages and microbiome gene content from humans who practice caloric restriction with adequate nutrition give similar clustering patterns. (A-D) Procrustes analysis of bacterial 16S rRNA sequences (weighted UniFrac) against KOs, CAZymes (glycoside hydrolases), MEROPS (peptidases), and Enzyme Commission numbers (E.C.s). Every sphere represents a single mammalian fecal community and is colored by host diet. The black end of each line connects to the 16S data for the sample, while the orange end is connected to the functional annotation data. The fit of each Procrustes transformation over the first three dimensions is reported as the  $M^2$  value. Spheres are colored differently for each human host.

| SampleID    | Common Name                     | Prove-nance | Diet | Gut Phys- | Order          | Family          | Genus / species                          |
|-------------|---------------------------------|-------------|------|-----------|----------------|-----------------|------------------------------------------|
| AfElphSD3   | African Elephant                | SD          | H    | HG        | Proboscidae    | Elephantidae    | <i>Loxodonta africana</i>                |
| Armadillo   | Southern Three-banded Armadillo | STL         | C    | S         | Xenarthra      | Dasypodidae     | <i>Tolypeutes matacus</i>                |
| BaboonSTL   | Hamadryas Baboon                | STL         | O    | S         | Primates       | Cercopithecidae | <i>Papio hamadryas</i>                   |
| BaboonW     | Hamadryas Baboon                | W           | O    | S         | Primates       | Cercopithecidae | <i>Papio hamadryas</i>                   |
| BigHornSD   | Bighorn Sheep                   | SD          | H    | FG        | Artiodactyla   | Bovidae         | <i>Ovis canadensis</i>                   |
| BigHornW3   | Bighorn sheep                   | W           | H    | FG        | Artiodactyla   | Bovidae         | <i>Ovis canadensis</i>                   |
| BlackBr2    | North American Black Bear       | STL         | O    | S         | Carnivora      | Ursidae         | <i>Ursus americanus</i>                  |
| BlackLemur  | Black Lemur                     | STL         | O    | S         | Primates       | Lemuridae       | <i>Eulemur macaco macaco</i>             |
| BlackRhino1 | Black Rhinoceros                | STL         | H    | HG        | Perissodactyla | Rhinocerotidae  | <i>Diceros bicornis</i>                  |
| BushDog1    | Bush Dog                        | STL         | C    | S         | Carnivora      | Canidae         | <i>Speothos venaticus</i>                |
| Callimicos  | Goeldi's Marmoset               | STL         | O    | S         | Primates       | Cebidae         | <i>Callimico goeldii</i>                 |
| Capybara    | Capybara                        | STL         | H    | HG        | Rodentia       | Caviidae        | <i>Hydrochaeris hydrochaeris</i>         |
| Chimp1      | Chimpanzee                      | STL         | O    | S         | Primates       | Hominidae       | <i>Pan troglodytes</i>                   |
| Chimp2      | Chimpanzee                      | STL         | O    | S         | Primates       | Hominidae       | <i>Pan troglodytes</i>                   |
| Colobus     | Black and White Colobus Monkey  | STL         | H    | FG        | Primates       | Cercopithecidae | <i>Colobus guereza</i>                   |
| Echidna     | Short-beaked Echidna            | STL         | C    | S         | Monotremata    | Tachyglossidae  | <i>Tachyglossidae aculeatus</i>          |
| Gazelle3    | Speke's Gazelle                 | STL         | H    | FG        | Artiodactyla   | Bovidae         | <i>Gazella spekei</i>                    |
| Giraffe2    | Reticulated Giraffe             | STL         | H    | FG        | Artiodactyla   | Giraffidae      | <i>Giraffa camelopardalis reticulata</i> |
| GorillaSTL  | Western Lowland Gorilla         | STL         | H    | HG        | Primates       | Hominidae       | <i>Gorilla gorilla</i>                   |
| Horse1      | Horse                           | W           | H    | HG        | Perissodactyla | Equidae         | <i>Equus equus</i>                       |
| Hyena2      | Spotted Hyena                   | STL         | C    | S         | Carnivora      | Hyaenidae       | <i>Crocuta crocuta</i>                   |
| HyraxSD     | Rock Hyrax                      | SD          | H    | FG        | Hyracoidea     | Procaviidae     | <i>Procavia capensis</i>                 |
| HyraxSTL    | Rock Hyrax                      | STL         | H    | FG        | Hyracoidea     | Procaviidae     | <i>Procavia capensis</i>                 |
| Kroo3       | Red Kangaroo                    | STL         | H    | FG        | Diprotodontia  | Macropidae      | <i>Macropus rufus</i>                    |
| Lion1       | Lion                            | STL         | C    | S         | Carnivora      | Pantherinae     | <i>Panthera leo</i>                      |
| Lion2       | Lion                            | STL         | C    | S         | Carnivora      | Pantherinae     | <i>Panthera leo</i>                      |
| Okapi1      | Okapi                           | STL         | H    | FG        | Artiodactyla   | Giraffidae      | <i>Okapia johnstoni</i>                  |
| Okapi2      | Okapi                           | STL         | H    | FG        | Artiodactyla   | Giraffidae      | <i>Okapia johnstoni</i>                  |
| Orang1      | Sumatran Orangutan              | STL         | H    | HG        | Primates       | Hominidae       | <i>Pongo pygmaeus abelii</i>             |
| PolarBr2    | Polar Bear                      | STL         | C    | S         | Carnivora      | Ursidae         | <i>Ursus maritimus</i>                   |
| Rabbit      | European Rabbit                 | STL         | H    | HG        | Lagomorpha     | Leporidae       | <i>Oryctolagus cuniculus</i>             |
| RTLemur     | Ring-tailed Lemur               | STL         | O    | S         | Primates       | Lemuridae       | <i>Lemur catta</i>                       |
| Saki        | White-faced Saki                | STL         | O    | S         | Primates       | Pitheciidae     | <i>Pithecia pithecia</i>                 |
| SpecBr2     | Spectacled Bear                 | STL         | O    | S         | Carnivora      | Ursidae         | <i>Tremarctos ornatus</i>                |
| SpgbkW      | Springbok                       | W           | H    | FG        | Artiodactyla   | Bovidae         | <i>Antidorcas marsupialis</i>            |
| Squirrel    | Prevost's Squirrel              | STL         | O    | S         | Rodent         | Sciuridae       | <i>Callosciurus prevostii</i>            |
| Urial2      | Transcaspiian Urial             | STL         | H    | FG        | Artiodactyla   | Bovidae         | <i>Ovis orientalis arkal</i>             |
| VWPig       | Visayam Warty Pig               | SD          | H    | FG        | Artiodactyla   | Suidae          | <i>Sus cebifons</i>                      |
| ZebraSTL1   | Grevy's Zebra                   | STL         | H    | HG        | Perissodactyla | Equidae         | <i>Equus grevyi</i>                      |

**Table S1.**

Metadata on 39 non-human mammals included in this study, including provenance, diet, gut physiology, and phylogenetic order.



| SampleID    | Total 16S rRNA V2 reads<br>(De-noised, Chimera Checked) | Total OTUs (97% ID) | Shannon's Index* |
|-------------|---------------------------------------------------------|---------------------|------------------|
| AfElphSD3   | 5130                                                    | 895                 | 7.88             |
| Armadillo   | 4889                                                    | 380                 | 6.06             |
| BaboonSTL   | 4480                                                    | 451                 | 5.64             |
| BaboonW     | 2788                                                    | 396                 | 6.28             |
| BigHornSD   | 4592                                                    | 1003                | 8.08             |
| BigHornW3   | 2281                                                    | 497                 | 4.80             |
| BlackBr2    | 2404                                                    | 30                  | 0.93             |
| BlackLemur  | 2997                                                    | 151                 | 3.65             |
| BlackRhino1 | 3781                                                    | 713                 | 7.19             |
| BushDog1    | 3345                                                    | 137                 | 4.22             |
| Callimicos  | 4549                                                    | 137                 | 3.56             |
| Capybara    | 3232                                                    | 661                 | 7.49             |
| Chimp1      | 3477                                                    | 564                 | 7.24             |
| Chimp2      | 3814                                                    | 553                 | 7.04             |
| Colobus     | 1979                                                    | 430                 | 7.24             |
| Echidna     | 3151                                                    | 254                 | 5.45             |
| Gazelle3    | 4296                                                    | 902                 | 7.99             |
| Giraffe2    | 3220                                                    | 701                 | 7.53             |
| GorillaSTL  | 3317                                                    | 515                 | 7.06             |
| Horse1      | 3982                                                    | 1269                | 8.77             |
| Hyena2      | 1900                                                    | 235                 | 6.13             |
| HyraxSD     | 3431                                                    | 504                 | 7.10             |
| HyraxSTL    | 3485                                                    | 428                 | 6.11             |
| Kroo3       | 4854                                                    | 870                 | 7.93             |
| Lion1       | 3692                                                    | 110                 | 3.62             |
| Lion2       | 4026                                                    | 141                 | 4.05             |
| Okapi1      | 4628                                                    | 929                 | 8.07             |
| Okapi2      | 4838                                                    | 943                 | 8.01             |
| Orang1      | 3299                                                    | 543                 | 7.12             |
| PolarBr2    | 3303                                                    | 84                  | 3.23             |
| Rabbit      | 3703                                                    | 301                 | 5.49             |
| RTLemur     | 4439                                                    | 571                 | 7.19             |
| Saki        | 7359                                                    | 325                 | 5.96             |
| SpecBr2     | 3143                                                    | 33                  | 2.01             |
| SpgbkW      | 4341                                                    | 860                 | 7.69             |
| Squirrel    | 2923                                                    | 189                 | 2.39             |
| Urial2      | 6281                                                    | 1243                | 8.24             |
| VWPig       | 3750                                                    | 690                 | 7.18             |
| ZebraSTL1   | 4576                                                    | 1083                | 7.95             |

\* average of 50 iterations at 1500 reads per sample

**Table S2.**  
Mammal 16S rRNA sequencing statistics

| SampleID    | Sequencing chemistry | Total shotgun reads (quality filtered, dereplicated) | Mean read length ( $\pm$ standard deviation) [nt] | Number of reads with KEGG Orthology group (KO) assignment | Total E.C. assignments | Number of reads with MEROPS assignment | Number of reads with CAZy assignment* |
|-------------|----------------------|------------------------------------------------------|---------------------------------------------------|-----------------------------------------------------------|------------------------|----------------------------------------|---------------------------------------|
| AfElphSD3   | FLX                  | 140869                                               | 170 ( $\pm$ 66)                                   | 24624                                                     | 17065                  | 1553                                   | 1664                                  |
| Armadillo   | FLX                  | 28737                                                | 226 ( $\pm$ 46)                                   | 9827                                                      | 6437                   | 685                                    | 641                                   |
| BaboonSTL   | FLX                  | 52293                                                | 224 ( $\pm$ 39)                                   | 14805                                                     | 9862                   | 1104                                   | 821                                   |
| BaboonW     | FLX                  | 31429                                                | 202 ( $\pm$ 60)                                   | 8039                                                      | 5184                   | 481                                    | 395                                   |
| BigHornSD   | Titanium             | 45680                                                | 399 ( $\pm$ 124)                                  | 14302                                                     | 9636                   | 1154                                   | 1145                                  |
| BigHornW3   | Titanium             | 51875                                                | 407 ( $\pm$ 122)                                  | 16006                                                     | 10600                  | 1168                                   | 1346                                  |
| BlackBr2    | Titanium             | 68884                                                | 410 ( $\pm$ 123)                                  | 44308                                                     | 27396                  | 2761                                   | 1641                                  |
| BlackLemur  | FLX                  | 37116                                                | 210 ( $\pm$ 50)                                   | 13510                                                     | 9237                   | 966                                    | 1037                                  |
| BlackRhino1 | FLX                  | 94535                                                | 203 ( $\pm$ 59)                                   | 22859                                                     | 15729                  | 1791                                   | 1762                                  |
| BushDog1    | FLX                  | 64646                                                | 223 ( $\pm$ 48)                                   | 23063                                                     | 14893                  | 1584                                   | 1281                                  |
| Callimicos  | FLX                  | 51502                                                | 217 ( $\pm$ 41)                                   | 16491                                                     | 11480                  | 1297                                   | 1122                                  |
| Capybara    | FLX                  | 107461                                               | 220 ( $\pm$ 46)                                   | 28456                                                     | 19755                  | 2025                                   | 2588                                  |
| Chimp1      | FLX                  | 65969                                                | 222 ( $\pm$ 42)                                   | 19179                                                     | 12829                  | 1336                                   | 1091                                  |
| Chimp2      | Titanium             | 19568                                                | 322 ( $\pm$ 159)                                  | 5142                                                      | 3297                   | 365                                    | 296                                   |
| Colobus     | FLX                  | 67621                                                | 218 ( $\pm$ 47)                                   | 19175                                                     | 13037                  | 1387                                   | 1370                                  |
| Echidna     | FLX                  | 65266                                                | 231 ( $\pm$ 43)                                   | 28973                                                     | 18621                  | 1775                                   | 822                                   |
| Gazelle3    | FLX                  | 68262                                                | 221 ( $\pm$ 44)                                   | 18741                                                     | 12737                  | 1352                                   | 1342                                  |
| Giraffe2    | FLX                  | 53668                                                | 182 ( $\pm$ 62)                                   | 13543                                                     | 9134                   | 967                                    | 1043                                  |
| GorillaSTL  | FLX                  | 24933                                                | 154 ( $\pm$ 65)                                   | 5397                                                      | 3622                   | 376                                    | 294                                   |
| Horse1      | FLX                  | 98800                                                | 213 ( $\pm$ 47)                                   | 23835                                                     | 16451                  | 1628                                   | 2092                                  |
| Hyena2      | FLX                  | 68456                                                | 228 ( $\pm$ 42)                                   | 22739                                                     | 14679                  | 1501                                   | 1187                                  |
| HyraxSD     | FLX                  | 42140                                                | 217 ( $\pm$ 45)                                   | 12362                                                     | 8291                   | 934                                    | 804                                   |
| HyraxSTL    | FLX                  | 66102                                                | 228 ( $\pm$ 39)                                   | 17711                                                     | 11951                  | 1285                                   | 1575                                  |
| Kroo3       | FLX                  | 22049                                                | 220 ( $\pm$ 47)                                   | 6227                                                      | 4202                   | 376                                    | 376                                   |
| Lion1       | FLX                  | 14236                                                | 221 ( $\pm$ 49)                                   | 5721                                                      | 3677                   | 346                                    | 305                                   |
| Lion2       | Titanium             | 75012                                                | 413 ( $\pm$ 120)                                  | 36205                                                     | 22217                  | 2683                                   | 2035                                  |
| Okapi1      | FLX                  | 32804                                                | 208 ( $\pm$ 53)                                   | 9183                                                      | 6248                   | 649                                    | 683                                   |
| Okapi2      | FLX                  | 22615                                                | 223 ( $\pm$ 43)                                   | 6373                                                      | 4234                   | 425                                    | 463                                   |
| Orang1      | FLX                  | 29219                                                | 203 ( $\pm$ 57)                                   | 7940                                                      | 5235                   | 521                                    | 326                                   |
| PolarBr2    | Titanium             | 56380                                                | 413 ( $\pm$ 122)                                  | 35745                                                     | 21472                  | 2414                                   | 958                                   |
| Rabbit      | FLX                  | 69106                                                | 232 ( $\pm$ 42)                                   | 18933                                                     | 12576                  | 1210                                   | 1412                                  |
| RTLemur     | Titanium             | 50463                                                | 409 ( $\pm$ 119)                                  | 16659                                                     | 10904                  | 1235                                   | 1789                                  |
| Saki        | Titanium             | 127069                                               | 411 ( $\pm$ 119)                                  | 37487                                                     | 25394                  | 3238                                   | 4078                                  |
| SpecBr2     | Titanium             | 38999                                                | 386 ( $\pm$ 133)                                  | 19407                                                     | 12982                  | 1266                                   | 1071                                  |
| SpgbkW      | FLX                  | 48935                                                | 232 ( $\pm$ 39)                                   | 15946                                                     | 10697                  | 1148                                   | 902                                   |
| Squirrel    | FLX                  | 43724                                                | 231 ( $\pm$ 42)                                   | 16070                                                     | 10925                  | 1075                                   | 1265                                  |
| Urial2      | FLX                  | 31996                                                | 199 ( $\pm$ 59)                                   | 7858                                                      | 5392                   | 586                                    | 531                                   |
| VWPig       | Titanium             | 59174                                                | 392 ( $\pm$ 127)                                  | 18638                                                     | 12624                  | 1456                                   | 1923                                  |
| ZebraSTL1   | FLX                  | 25693                                                | 224 ( $\pm$ 46)                                   | 6198                                                      | 4148                   | 418                                    | 512                                   |

\*All reads assigned as Glycoside Hydrolase, Polysaccharide Lyase, or Carbohydrate Esterase

**Table S3.**

Mammal fecal community DNA shotgun pyrosequencing datasets: statistics.

**Table S4A**

| <b>SampleID</b> | <b>Total number of reads<br/>with hit in nr (%)</b> | <b>Total number of reads<br/>with no hit (%)</b> |
|-----------------|-----------------------------------------------------|--------------------------------------------------|
| AfElphSD3       | 94105 (66.8%)                                       | 46764 (33.2%)                                    |
| Armadillo       | 26074 (90.7%)                                       | 2663 (9.3%)                                      |
| BaboonSTL       | 45503 (87.0%)                                       | 6790 (13.0%)                                     |
| BaboonW         | 25559 (81.3%)                                       | 5870 (18.7%)                                     |
| BigHornSD       | 41760 (91.4%)                                       | 3920 (8.6%)                                      |
| BigHornW3       | 47427 (91.4%)                                       | 4448 (8.6%)                                      |
| BlackBr2        | 66547 (96.6%)                                       | 2337 (3.4%)                                      |
| BlackLemur      | 33617 (90.6%)                                       | 3499 (9.4%)                                      |
| BlackRhino1     | 76007 (80.4%)                                       | 18528 (19.6%)                                    |
| BushDog1        | 59481 (92.0%)                                       | 5165 (8.0%)                                      |
| Callimicos      | 45531 (88.4%)                                       | 5971 (11.6%)                                     |
| Capybara        | 91644 (85.3%)                                       | 15817 (14.7%)                                    |
| Chimp1          | 56975 (86.4%)                                       | 8994 (13.6%)                                     |
| Chimp2          | 15646 (80.0%)                                       | 3922 (20.0%)                                     |
| Colobus         | 58295 (86.2%)                                       | 9326 (13.8%)                                     |
| Echidna         | 58111 (89.0%)                                       | 7155 (11.0%)                                     |
| Gazelle3        | 57696 (84.5%)                                       | 10566 (15.5%)                                    |
| Giraffe2        | 42041 (78.3%)                                       | 11627 (21.7%)                                    |
| GorillaSTL      | 18249 (73.2%)                                       | 6684 (26.8%)                                     |
| Horse1          | 81167 (82.2%)                                       | 17633 (17.8%)                                    |
| Hyena2          | 61471 (89.8%)                                       | 6985 (10.2%)                                     |
| HyraxSD         | 36955 (87.7%)                                       | 5185 (12.3%)                                     |
| HyraxSTL        | 57433 (86.9%)                                       | 8669 (13.1%)                                     |
| Kroo3           | 18676 (84.7%)                                       | 3373 (15.3%)                                     |
| Lion1           | 13248 (93.1%)                                       | 988 (6.9%)                                       |
| Lion2           | 71512 (95.3%)                                       | 3500 (4.7%)                                      |
| Okapi1          | 27257 (83.1%)                                       | 5547 (16.9%)                                     |
| Okapi2          | 19134 (84.6%)                                       | 3481 (15.4%)                                     |
| Orang1          | 24438 (83.6%)                                       | 4781 (16.4%)                                     |
| PolarBr2        | 53835 (95.2%)                                       | 2545 (4.5%)                                      |
| Rabbit          | 60272 (87.2%)                                       | 8834 (12.8%)                                     |
| RTLemur         | 47200 (93.5%)                                       | 3263 (6.5%)                                      |
| Saki            | 115967 (91.3%)                                      | 11102 (8.7%)                                     |
| SpecBr2         | 35980 (92.3%)                                       | 3019 (7.7%)                                      |
| SpgbkW          | 41979 (85.8%)                                       | 6956 (14.2%)                                     |
| Squirrel        | 40193 (91.9%)                                       | 3531 (8.1%)                                      |
| Urial2          | 24902 (77.8%)                                       | 7094 (22.2%)                                     |
| VWPig           | 54002 (91.3%)                                       | 5172 (8.7%)                                      |
| ZebraSTL1       | 21268 (82.8%)                                       | 4425 (17.2%)                                     |

**Table S4B**

| SampleID    | Bacteria | Eukarya | Archaea | Viruses | Cellular Organism / Root | Not assigned |
|-------------|----------|---------|---------|---------|--------------------------|--------------|
| AfElphSD3   | 73.54%   | 4.52%   | 1.141%  | 0.006%  | 17.59%                   | 3.21%        |
| Armadillo   | 89.82%   | 1.03%   | ND      | ND      | 4.84%                    | 4.31%        |
| BaboonSTL   | 77.90%   | 3.66%   | 0.149%  | 0.022%  | 13.73%                   | 4.54%        |
| BaboonW     | 80.05%   | 2.18%   | 0.184%  | ND      | 11.90%                   | 5.69%        |
| BigHornSD   | 78.23%   | 2.23%   | 0.259%  | ND      | 15.33%                   | 3.96%        |
| BigHornW3   | 77.72%   | 2.71%   | 0.346%  | 0.036%  | 15.47%                   | 3.72%        |
| BlackBr2    | 95.15%   | 0.15%   | 0.017%  | 0.089%  | 3.04%                    | 1.55%        |
| BlackLemur  | 89.33%   | 0.99%   | 0.027%  | 0.036%  | 6.14%                    | 3.48%        |
| BlackRhino1 | 78.12%   | 3.74%   | 0.345%  | 0.007%  | 14.58%                   | 3.21%        |
| BushDog1    | 91.22%   | 1.15%   | ND      | 0.000%  | 5.12%                    | 2.51%        |
| Callimicos  | 88.54%   | 1.77%   | ND      | 0.011%  | 6.48%                    | 3.19%        |
| Capybara    | 77.75%   | 3.72%   | 1.164%  | 0.010%  | 14.30%                   | 3.06%        |
| Chimp1      | 83.46%   | 2.78%   | 1.773%  | ND      | 8.54%                    | 3.45%        |
| Chimp2      | 78.03%   | 1.99%   | 0.217%  | ND      | 13.50%                   | 6.27%        |
| Colobus     | 78.29%   | 3.90%   | 0.379%  | 0.026%  | 13.62%                   | 3.79%        |
| Echidna     | 87.79%   | 1.29%   | ND      | 0.083%  | 7.19%                    | 3.66%        |
| Gazelle3    | 79.00%   | 3.81%   | 0.802%  | 0.009%  | 12.31%                   | 4.07%        |
| Giraffe2    | 77.57%   | 3.17%   | 0.480%  | ND      | 14.34%                   | 4.45%        |
| GorillaSTL  | 79.70%   | 1.38%   | 1.255%  | ND      | 11.57%                   | 6.10%        |
| Horse1      | 71.02%   | 5.35%   | 0.463%  | 0.007%  | 19.77%                   | 3.39%        |
| Hyena2      | 85.01%   | 2.35%   | 0.011%  | ND      | 9.16%                    | 3.46%        |
| HyraxSD     | 79.75%   | 2.51%   | 0.674%  | ND      | 12.52%                   | 4.55%        |
| HyraxSTL    | 80.23%   | 3.17%   | 0.919%  | ND      | 12.09%                   | 3.59%        |
| Kroo3       | 77.37%   | 2.66%   | ND      | ND      | 12.47%                   | 7.51%        |
| Lion1       | 88.90%   | 0.52%   | ND      | 0.038%  | 4.97%                    | 5.56%        |
| Lion2       | 92.14%   | 1.05%   | ND      | 0.063%  | 4.67%                    | 2.07%        |
| Okapi1      | 79.70%   | 2.65%   | 0.352%  | ND      | 11.90%                   | 5.40%        |
| Okapi2      | 77.40%   | 2.32%   | 0.930%  | ND      | 12.09%                   | 7.27%        |
| Orang1      | 78.86%   | 2.12%   | 0.982%  | ND      | 12.44%                   | 5.61%        |
| PolarBr2    | 91.36%   | 0.38%   | 0.000%  | 0.305%  | 5.44%                    | 2.52%        |
| Rabbit      | 78.92%   | 3.58%   | 0.037%  | ND      | 13.76%                   | 3.70%        |
| RTLemur     | 85.26%   | 1.40%   | 0.030%  | ND      | 10.47%                   | 2.85%        |
| Saki        | 83.57%   | 4.83%   | 0.197%  | 0.015%  | 9.26%                    | 2.12%        |
| SpecBr2     | 88.51%   | 0.86%   | 0.019%  | 2.118%  | 5.53%                    | 2.97%        |
| SpgbkW      | 80.45%   | 3.00%   | 0.195%  | ND      | 11.64%                   | 4.72%        |
| Squirrel    | 90.64%   | 1.01%   | 0.030%  | ND      | 5.21%                    | 3.11%        |
| Urial2      | 78.05%   | 2.71%   | 1.426%  | ND      | 11.60%                   | 6.22%        |
| VWPig       | 80.94%   | 2.36%   | 0.200%  | ND      | 13.35%                   | 3.15%        |
| ZebraSTL1   | 69.46%   | 4.03%   | 0.244%  | ND      | 18.53%                   | 7.73%        |

"ND" = No reads detected in this taxonomic branch

**Table S4.**

Mammal fecal community DNA shotgun pyrosequencing datasets: phylogenetic assignments. (A) Summary of total hits against the NCBI non-redundant (nr) database. (B) Percentage of all reads assigned to the major phylogenetic divisions (normalized to total number of reads with hit in NCBI nr database).

| E.C. Number | Coef-ficient* | AIC†  | P-value  | Adjusted P-value (BH)* | Annotation§                                                             |
|-------------|---------------|-------|----------|------------------------|-------------------------------------------------------------------------|
| EC2.7.1.69  | 1.644         | 596.7 | 7.8e-320 | 1.3e-316               | Protein-N(pi)-phosphohistidine--sugar phosphotransferase                |
| EC2.7.13.3  | 1.027         | 477.0 | 1.0E-136 | 8.0E-134               | Histidine kinase                                                        |
| EC3.6.3.12  | 2.843         | 319.8 | 4.4E-112 | 2.3E-109               | Potassium-transporting ATPase                                           |
| EC1.7.99.4  | 2.494         | 319.1 | 1.5E-69  | 6.2E-67                | Nitrate reductase                                                       |
| EC3.2.1.86  | 1.767         | 341.0 | 2.0E-66  | 6.4E-64                | 6-phospho-beta-glucosidase                                              |
| EC1.2.7.3   | -1.348        | 235.5 | 1.7E-56  | 4.6E-54                | 2-oxoglutarate synthase                                                 |
| EC1.-.-.-   | 0.656         | 439.8 | 7.9E-55  | 1.8E-52                | NA                                                                      |
| EC4.1.1.31  | 3.032         | 139.0 | 6.3E-45  | 1.3E-42                | Phosphoenolpyruvate carboxylase                                         |
| EC2.7.9.1   | -0.991        | 310.8 | 1.0E-44  | 1.8E-42                | Pyruvate, phosphate dikinase                                            |
| EC2.4.1.12  | 3.341         | 187.9 | 1.3E-43  | 2.0E-41                | Cellulose synthase (UDP-forming)                                        |
| EC1.17.4.1  | 1.045         | 210.2 | 1.3E-37  | 2.0E-35                | Ribonucleoside-diphosphate reductase                                    |
| EC1.2.7.8   | -1.278        | 250.8 | 2.5E-37  | 3.4E-35                | Indolepyruvate ferredoxin oxidoreductase                                |
| EC1.6.5.-   | -1.487        | 241.6 | 5.6E-37  | 6.9E-35                | NA                                                                      |
| EC3.1.21.3  | -0.688        | 359.5 | 7.2E-37  | 8.2E-35                | Type I site-specific deoxyribonuclease                                  |
| EC1.12.99.6 | 2.596         | 161.2 | 1.3E-36  | 1.4E-34                | Hydrogenase (acceptor)                                                  |
| EC1.10.3.-  | 1.441         | 237.6 | 6.4E-36  | 6.5E-34                | NA                                                                      |
| EC3.4.11.2  | 2.140         | 177.4 | 4.5E-35  | 4.3E-33                | Membrane alanyl aminopeptidase                                          |
| EC2.1.1.72  | -0.654        | 383.4 | 1.9E-33  | 1.7E-31                | Site-specific DNA-methyltransferase (adenine-specific)                  |
| EC1.14.13.- | 3.101         | 160.2 | 4.3E-33  | 3.7E-31                | NA                                                                      |
| EC4.1.1.3   | -0.880        | 306.6 | 1.4E-32  | 1.1E-30                | Oxaloacetate decarboxylase                                              |
| EC2.1.1.14  | 2.066         | 157.0 | 1.6E-31  | 1.2E-29                | 5-methyltetrahydropteroyltriglutamate--homocysteine S-methyltransferase |
| EC3.6.3.2   | 2.098         | 144.3 | 5.5E-31  | 4.0E-29                | Magnesium-importing ATPase                                              |
| EC3.2.1.21  | -0.615        | 305.8 | 1.8E-30  | 1.3E-28                | Beta-glucosidase                                                        |
| EC2.7.3.9   | 1.075         | 176.2 | 5.1E-30  | 3.4E-28                | Phosphoenolpyruvate--protein phosphotransferase                         |
| EC4.1.1.17  | 2.830         | 134.2 | 1.3E-29  | 8.6E-28                | Ornithine decarboxylase                                                 |
| EC2.7.7.42  | 3.556         | 132.4 | 1.0E-28  | 6.4E-27                | [Glutamate--ammonia-ligase] adenylyltransferase                         |
| EC1.1.1.1   | 0.708         | 242.7 | 1.4E-28  | 8.2E-27                | Alcohol dehydrogenase                                                   |
| EC5.1.2.3   | 2.648         | 202.7 | 4.4E-28  | 2.5E-26                | 3-hydroxybutyryl-CoA epimerase                                          |
| EC1.2.7.-   | -0.586        | 280.5 | 2.7E-27  | 1.5E-25                | NA                                                                      |
| EC6.4.1.2   | 1.039         | 190.7 | 5.6E-27  | 3.0E-25                | Acetyl-CoA carboxylase                                                  |
| EC1.1.1.49  | 2.907         | 127.2 | 2.5E-26  | 1.3E-24                | Glucose-6-phosphate dehydrogenase                                       |
| EC4.2.1.20  | -0.974        | 202.6 | 3.4E-26  | 1.7E-24                | Tryptophan synthase                                                     |
| EC1.2.1.2   | 0.975         | 293.4 | 1.4E-25  | 6.8E-24                | Formate dehydrogenase                                                   |
| EC1.8.1.2   | 2.504         | 154.5 | 3.1E-25  | 1.5E-23                | Sulfite reductase (NADPH)                                               |
| EC3.1.3.-   | 1.659         | 226.7 | 7.6E-25  | 3.5E-23                | NA                                                                      |
| EC2.3.3.9   | 2.746         | 135.8 | 3.4E-24  | 1.5E-22                | Malate synthase                                                         |
| EC2.1.1.52  | 1.617         | 172.6 | 4.2E-24  | 1.8E-22                | rRNA (guanine-N(2)-)-methyltransferase                                  |
| EC1.7.2.3   | 2.274         | 177.0 | 5.6E-24  | 2.4E-22                | Trimethylamine-N-oxide reductase (cytochrome c)                         |
| EC2.7.8.20  | 3.610         | 91.6  | 3.1E-23  | 1.3E-21                | glycerophosphotransferase                                               |
| EC3.1.11.-  | 2.802         | 139.9 | 3.3E-23  | 1.3E-21                | NA                                                                      |
| EC3.4.24.55 | 4.588         | 92.6  | 6.4E-23  | 2.5E-21                | Pitrilysin                                                              |
| EC3.2.1.17  | 2.422         | 132.2 | 1.1E-22  | 4.1E-21                | Lysozyme                                                                |
| EC1.8.1.7   | 2.530         | 133.7 | 2.5E-22  | 9.5E-21                | Glutathione-disulfide reductase                                         |
| EC1.2.4.2   | 2.407         | 169.6 | 2.8E-22  | 1.0E-20                | Oxoglutarate dehydrogenase (succinyl-transferring)                      |
| EC2.3.1.15  | 3.136         | 121.9 | 3.8E-22  | 1.3E-20                | Glycerol-3-phosphate O-acyltransferase                                  |
| EC3.1.26.12 | 2.348         | 137.0 | 4.6E-22  | 1.6E-20                | Ribonuclease E                                                          |
| EC1.1.5.2   | 20.587        | 65.8  | 6.5E-22  | 2.2E-20                | Quinoprotein glucose dehydrogenase                                      |
| EC2.4.1.20  | -1.433        | 188.2 | 2.1E-21  | 7.0E-20                | Cellobiose phosphorylase                                                |
| EC1.6.99.3  | 1.407         | 185.5 | 4.4E-21  | 1.5E-19                | NADH dehydrogenase                                                      |
| EC1.17.1.4  | 0.940         | 201.5 | 1.4E-20  | 4.4E-19                | Xanthine dehydrogenase                                                  |
| EC2.4.1.8   | 2.530         | 170.3 | 1.9E-20  | 6.1E-19                | Maltose phosphorylase                                                   |
| EC4.2.1.17  | 1.321         | 290.8 | 2.7E-20  | 8.2E-19                | Enoyl-CoA hydratase                                                     |
| EC1.21.4.1  | 1.978         | 124.7 | 4.1E-20  | 1.2E-18                | D-proline reductase (dithiol)                                           |
| EC1.2.3.3   | 3.446         | 148.2 | 1.8E-19  | 5.3E-18                | Pyruvate oxidase                                                        |
| EC3.3.1.1   | -1.766        | 142.0 | 3.0E-19  | 8.8E-18                | Adenosylhomocysteinase                                                  |
| EC6.3.4.14  | 1.211         | 146.4 | 3.1E-19  | 8.8E-18                | Biotin carboxylase                                                      |
| EC6.3.1.8   | 3.783         | 99.3  | 3.5E-19  | 9.9E-18                | Glutathionylspermidine synthase                                         |
| EC6.2.1.3   | -0.812        | 193.0 | 3.6E-19  | 9.9E-18                | Long-chain-fatty-acid--CoA ligase                                       |
| EC2.3.2.-   | 2.110         | 213.5 | 3.9E-19  | 1.1E-17                | NA                                                                      |
| EC2.1.1.107 | 1.413         | 132.4 | 4.0E-19  | 1.1E-17                | Uroporphyrinogen-III C-methyltransferase                                |

|             |        |       |         |         |                                                        |
|-------------|--------|-------|---------|---------|--------------------------------------------------------|
| EC3.6.3.3   | 1.308  | 136.7 | 4.9E-19 | 1.3E-17 | Cadmium-exporting ATPase                               |
| EC5.3.3.8   | 2.858  | 145.6 | 5.0E-19 | 1.3E-17 | Dodecenoyl-CoA isomerase                               |
| EC2.7.1.90  | -1.565 | 208.4 | 1.3E-18 | 3.4E-17 | Diphosphate--fructose-6-phosphate 1-phosphotransferase |
| EC6.2.1.30  | -0.975 | 230.1 | 2.1E-18 | 5.3E-17 | Phenylacetate--CoA ligase                              |
| EC4.1.1.32  | -2.447 | 139.8 | 2.3E-18 | 5.8E-17 | Phosphoenolpyruvate carboxykinase (GTP)                |
| EC2.1.1.79  | 2.957  | 102.4 | 4.6E-18 | 1.1E-16 | Cyclopropane-fatty-acyl-phospholipid synthase          |
| EC1.7.1.4   | 2.064  | 126.2 | 6.0E-18 | 1.4E-16 | Nitrite reductase (NAD(P)H)                            |
| EC2.1.1.37  | -0.757 | 270.1 | 6.3E-18 | 1.5E-16 | DNA (cytosine-5-)-methyltransferase                    |
| EC1.1.1.35  | 1.549  | 228.2 | 8.0E-18 | 1.9E-16 | 3-hydroxyacyl-CoA dehydrogenase                        |
| EC1.2.1.16  | 2.141  | 114.3 | 8.1E-18 | 1.9E-16 | Succinate-semialdehyde dehydrogenase (NAD(P)(+))       |
| EC6.2.1.1   | -0.900 | 221.5 | 2.0E-17 | 4.4E-16 | Acetate--CoA ligase                                    |
| EC3.2.1.55  | -0.918 | 235.1 | 2.0E-17 | 4.4E-16 | Alpha-N-arabinofuranosidase                            |
| EC6.1.1.18  | -0.774 | 207.7 | 2.7E-17 | 6.0E-16 | Glutamine--tRNA ligase                                 |
| EC1.16.1.1  | 2.913  | 74.8  | 3.7E-17 | 8.0E-16 | Mercury(II) reductase                                  |
| EC2.3.1.16  | 2.108  | 179.8 | 5.1E-17 | 1.1E-15 | Acetyl-CoA C-acyltransferase                           |
| EC2.7.1.144 | 2.108  | 104.0 | 5.1E-17 | 1.1E-15 | Tagatose-6-phosphate kinase                            |
| EC6.3.2.2   | 2.060  | 94.2  | 6.8E-17 | 1.4E-15 | Glutamate--cysteine ligase                             |
| EC1.4.1.4   | -0.747 | 184.7 | 7.4E-17 | 1.5E-15 | Glutamate dehydrogenase (NADP(+))                      |
| EC1.5.5.-   | 2.453  | 98.4  | 7.6E-17 | 1.5E-15 | NA                                                     |
| EC3.1.1.45  | 3.656  | 83.9  | 8.4E-17 | 1.7E-15 | Carboxymethylenebutenolidase                           |
| EC3.6.5.3   | -0.343 | 307.7 | 1.2E-16 | 2.3E-15 | Protein-synthesizing GTPase                            |
| EC3.6.1.11  | 1.901  | 113.7 | 1.7E-16 | 3.4E-15 | Exopolyphosphatase                                     |
| EC2.7.1.12  | 2.730  | 94.6  | 2.3E-16 | 4.5E-15 | Gluconokinase                                          |
| EC1.8.99.-  | 1.409  | 179.8 | 7.2E-16 | 1.4E-14 | NA                                                     |
| EC3.2.1.122 | 3.600  | 49.4  | 7.4E-16 | 1.4E-14 | Maltose-6'-phosphate glucosidase                       |
| EC1.7.1.7   | 3.015  | 89.2  | 9.4E-16 | 1.8E-14 | GMP reductase                                          |
| EC4.1.2.40  | 1.806  | 113.4 | 1.3E-15 | 2.5E-14 | Tagatose-bisphosphate aldolase                         |
| EC4.1.2.9   | 2.391  | 189.4 | 1.4E-15 | 2.6E-14 | Phosphoketolase                                        |
| EC1.18.1.-  | 20.206 | 52.4  | 1.9E-15 | 3.4E-14 | NA                                                     |
| EC1.5.99.8  | 1.654  | 141.0 | 2.5E-15 | 4.4E-14 | Proline dehydrogenase                                  |
| EC2.6.1.1   | -0.737 | 212.8 | 3.9E-15 | 6.9E-14 | Aspartate transaminase                                 |
| EC5.1.3.9   | 1.734  | 80.9  | 3.9E-15 | 6.9E-14 | N-acylglucosamine-6-phosphate 2-epimerase              |
| EC3.5.99.4  | 20.170 | 54.4  | 5.8E-15 | 1.0E-13 | N-isopropylammelide isopropylaminohydrolase            |
| EC3.1.1.31  | 2.443  | 89.7  | 5.9E-15 | 1.0E-13 | 6-phosphogluconolactonase                              |
| EC1.2.1.10  | 0.667  | 201.3 | 7.2E-15 | 1.2E-13 | Acetaldehyde dehydrogenase (acetylating)               |
| EC2.2.1.2   | 1.484  | 107.8 | 7.3E-15 | 1.2E-13 | Transaldolase                                          |
| EC2.5.1.18  | 2.963  | 67.9  | 7.6E-15 | 1.3E-13 | Glutathione transferase                                |
| EC1.11.1.6  | 1.309  | 241.0 | 9.7E-15 | 1.6E-13 | Catalase                                               |
| EC3.2.2.1   | 1.444  | 134.9 | 1.5E-14 | 2.5E-13 | Purine nucleosidase                                    |
| EC2.1.2.1   | -0.752 | 174.1 | 1.8E-14 | 2.8E-13 | Glycine hydroxymethyltransferase                       |
| EC2.7.7.58  | 20.132 | 52.1  | 1.8E-14 | 2.9E-13 | (2,3-dihydroxybenzoyl)adenylate synthase               |
| EC2.9.1.-   | 20.132 | 54.2  | 1.8E-14 | 2.9E-13 | NA                                                     |
| EC3.6.3.32  | 3.511  | 56.5  | 1.9E-14 | 3.0E-13 | Quaternary-amine-transporting ATPase                   |
| EC2.4.1.129 | 0.803  | 159.5 | 2.3E-14 | 3.6E-13 | Peptidoglycan glycosyltransferase                      |
| EC2.7.7.59  | 2.506  | 86.1  | 2.4E-14 | 3.7E-13 | [Protein-PII] uridylyltransferase                      |
| EC2.6.1.85  | 2.124  | 87.5  | 3.1E-14 | 4.7E-13 | Aminodeoxychorismate synthase                          |
| EC6.3.2.3   | 4.105  | 65.3  | 3.4E-14 | 5.1E-13 | Glutathione synthase                                   |
| EC1.8.98.1  | -1.171 | 205.7 | 5.4E-14 | 8.0E-13 | CoB--CoM heterodisulfide reductase                     |
| EC3.2.1.4   | -1.072 | 160.5 | 5.4E-14 | 8.0E-13 | Cellulase                                              |
| EC1.2.1.71  | 20.093 | 54.8  | 5.8E-14 | 8.4E-13 | Succinylglutamate-semialdehyde dehydrogenase           |
| EC2.7.11.5  | 20.093 | 62.5  | 5.8E-14 | 8.4E-13 | [Isocitrate dehydrogenase (NADP(+))] kinase            |
| EC3.2.1.28  | 2.907  | 94.2  | 6.1E-14 | 8.7E-13 | Alpha, alpha-trehalase                                 |
| EC3.4.14.11 | 2.302  | 131.0 | 6.6E-14 | 9.4E-13 | Xaa-Pro dipeptidyl-peptidase                           |
| EC2.7.7.6   | -0.239 | 329.2 | 8.1E-14 | 1.1E-12 | DNA-directed RNA polymerase                            |
| EC2.7.1.95  | 1.917  | 185.0 | 8.5E-14 | 1.2E-12 | Kanamycin kinase                                       |
| EC3.4.14.4  | -1.513 | 151.1 | 9.9E-14 | 1.4E-12 | Dipeptidyl-peptidase III                               |
| EC4.1.1.47  | 4.070  | 60.9  | 1.0E-13 | 1.4E-12 | Tartronate-semialdehyde synthase                       |
| EC5.99.1.3  | -0.283 | 338.2 | 1.4E-13 | 1.9E-12 | DNA topoisomerase (ATP-hydrolyzing)                    |
| EC3.6.1.40  | 3.446  | 78.6  | 1.7E-13 | 2.3E-12 | Guanosine-5'-triphosphate,3'-diphosphate diphosphatase |
| EC5.4.2.8   | -0.555 | 219.1 | 1.8E-13 | 2.4E-12 | Phosphomannomutase                                     |
| EC3.4.11.23 | 20.052 | 57.8  | 1.8E-13 | 2.4E-12 | PepB aminopeptidase                                    |
| EC3.1.3.26  | 20.052 | 53.6  | 1.8E-13 | 2.4E-12 | 4-phytase                                              |
| EC5.4.4.2   | 1.818  | 113.1 | 2.8E-13 | 3.7E-12 | Isochorismate synthase                                 |

|              |         |       |         |         |                                                                        |
|--------------|---------|-------|---------|---------|------------------------------------------------------------------------|
| EC1.6.1.1    | 4.034   | 71.0  | 3.2E-13 | 4.1E-12 | NAD(P)(+) transhydrogenase (B-specific)                                |
| EC4.1.99.3   | 2.684   | 91.5  | 3.7E-13 | 4.8E-12 | Deoxyribodipyrimidine photo-lyase                                      |
| EC3.4.11.5   | 1.878   | 135.3 | 4.8E-13 | 6.2E-12 | Prolyl aminopeptidase                                                  |
| EC3.1.4.16   | 1.270   | 121.5 | 1.6E-12 | 2.0E-11 | 2',3'-cyclic-nucleotide 2'-phosphodiesterase                           |
| EC2.7.1.73   | 19.965  | 49.0  | 1.8E-12 | 2.3E-11 | Inosine kinase                                                         |
| EC1.1.-.-    | 1.081   | 196.9 | 2.4E-12 | 3.0E-11 | NA                                                                     |
| EC3.11.1.1   | 3.957   | 44.7  | 2.9E-12 | 3.6E-11 | Phosphonoacetaldehyde hydrolase                                        |
| EC3.2.1.51   | -0.663  | 348.3 | 5.5E-12 | 6.8E-11 | Alpha-L-fucosidase                                                     |
| EC1.14.11.17 | 20.918  | 47.5  | 5.8E-12 | 6.9E-11 | Taurine dioxygenase                                                    |
| EC1.1.1.154  | 20.918  | 47.7  | 5.8E-12 | 6.9E-11 | Ureidoglycolate dehydrogenase                                          |
| EC5.5.-.-    | 19.918  | 49.0  | 5.8E-12 | 6.9E-11 | NA                                                                     |
| EC6.3.5.3    | -0.384  | 248.5 | 7.1E-12 | 8.5E-11 | Phosphoribosylformylglycinamide synthase                               |
| EC3.1.6.-    | 1.132   | 137.2 | 7.4E-12 | 8.7E-11 | NA                                                                     |
| EC1.3.1.76   | 1.740   | 100.0 | 8.2E-12 | 9.6E-11 | Precorrin-2 dehydrogenase                                              |
| EC4.2.1.30   | 1.740   | 92.6  | 8.2E-12 | 9.6E-11 | Glycerol dehydratase                                                   |
| EC4.99.1.4   | 1.740   | 100.0 | 8.2E-12 | 9.6E-11 | Sirohydrochlorin ferrochelataase                                       |
| EC3.5.3.23   | 3.916   | 66.5  | 8.9E-12 | 1.0E-10 | N-succinylarginine dihydrolase                                         |
| EC1.9.3.1    | 1.674   | 140.7 | 9.9E-12 | 1.1E-10 | Cytochrome-c oxidase                                                   |
| EC3.5.2.6    | 1.567   | 111.9 | 1.2E-11 | 1.4E-10 | Beta-lactamase                                                         |
| EC2.7.1.113  | 2.972   | 113.2 | 1.3E-11 | 1.4E-10 | Deoxyguanosine kinase                                                  |
| EC3.2.1.85   | 2.972   | 66.8  | 1.3E-11 | 1.4E-10 | 6-phospho-beta-galactosidase                                           |
| EC6.2.1.17   | 2.972   | 65.1  | 1.3E-11 | 1.4E-10 | Propionate--CoA ligase                                                 |
| EC2.5.1.49   | -0.602  | 215.5 | 1.3E-11 | 1.5E-10 | O-acetylhomoserine aminocarboxypropyltransferase                       |
| EC2.7.7.8    | -0.477  | 206.1 | 1.4E-11 | 1.5E-10 | Polyribonucleotide nucleotidyltransferase                              |
| EC2.7.7.9    | 1.090   | 155.3 | 1.7E-11 | 1.8E-10 | UTP--glucose-1-phosphate uridylyltransferase                           |
| EC3.5.2.5    | 21.870  | 28.6  | 1.8E-11 | 2.0E-10 | Allantoinase                                                           |
| EC4.2.1.79   | 3.874   | 55.2  | 2.7E-11 | 2.9E-10 | 2-methylcitrate dehydratase                                            |
| EC6.3.1.2    | -0.411  | 265.9 | 2.9E-11 | 3.1E-10 | Glutamate--ammonia ligase                                              |
| EC2.3.1.54   | 0.411   | 232.2 | 3.0E-11 | 3.1E-10 | Formate C-acetyltransferase                                            |
| EC3.4.15.5   | -0.897  | 184.0 | 5.1E-11 | 5.4E-10 | Peptidyl-dipeptidase Dep                                               |
| EC1.2.1.19   | 20.818  | 45.0  | 5.8E-11 | 6.0E-10 | Aminobutyraldehyde dehydrogenase                                       |
| EC4.1.1.85   | 20.818  | 40.9  | 5.8E-11 | 6.0E-10 | 3-dehydro-L-gulonate-6-phosphate decarboxylase                         |
| EC4.2.1.12   | 20.818  | 40.8  | 5.8E-11 | 6.0E-10 | Phosphogluconate dehydratase                                           |
| EC1.1.99.16  | 2.289   | 82.7  | 5.8E-11 | 6.0E-10 | Malate dehydrogenase (acceptor)                                        |
| EC4.4.1.8    | 1.530   | 142.0 | 5.9E-11 | 6.0E-10 | Cystathionine beta-lyase                                               |
| EC3.5.4.4    | 1.487   | 93.0  | 6.0E-11 | 6.1E-10 | Adenosine deaminase                                                    |
| EC2.7.2.2    | 1.044   | 141.1 | 7.4E-11 | 7.4E-10 | Carbamate kinase                                                       |
| EC1.2.4.4    | -1.756  | 127.5 | 9.7E-11 | 9.7E-10 | 3-methyl-2-oxobutanoate dehydrogenase (2-methylpropanoyl-transferring) |
| EC1.1.99.1   | 2.898   | 70.3  | 1.0E-10 | 1.0E-09 | Choline dehydrogenase                                                  |
| EC1.14.12.17 | 2.898   | 62.2  | 1.0E-10 | 1.0E-09 | Nitric oxide dioxygenase                                               |
| EC1.3.1.74   | -0.637  | 185.4 | 1.1E-10 | 1.1E-09 | 2-alkenal reductase                                                    |
| EC6.1.1.5    | -0.380  | 225.1 | 1.1E-10 | 1.1E-09 | Isoleucine--tRNA ligase                                                |
| EC3.2.1.78   | -20.430 | 83.0  | 1.2E-10 | 1.2E-09 | Mannan endo-1,4-beta-mannosidase                                       |
| EC5.1.3.14   | -0.712  | 188.6 | 1.3E-10 | 1.2E-09 | UDP-N-acetylglucosamine 2-epimerase                                    |
| EC2.9.1.1    | 1.469   | 95.2  | 1.3E-10 | 1.2E-09 | L-seryl-tRNA(Sec) selenium transferase                                 |
| EC1.1.1.22   | -0.757  | 175.8 | 1.3E-10 | 1.2E-09 | UDP-glucose 6-dehydrogenase                                            |
| EC3.2.1.8    | -2.130  | 111.2 | 1.4E-10 | 1.4E-09 | Endo-1,4-beta-xylanase                                                 |
| EC4.1.2.-    | 1.113   | 149.6 | 1.5E-10 | 1.4E-09 | NA                                                                     |
| EC5.4.99.2   | -0.702  | 212.2 | 1.5E-10 | 1.4E-09 | Methylmalonyl-CoA mutase                                               |
| EC1.14.14.3  | 2.258   | 83.6  | 1.5E-10 | 1.4E-09 | Alkanal monooxygenase (FMN-linked)                                     |
| EC5.4.3.3    | -1.901  | 129.2 | 1.6E-10 | 1.4E-09 | Beta-lysine 5,6-aminomutase                                            |
| EC2.4.1.5    | 19.764  | 63.9  | 1.8E-10 | 1.7E-09 | Dextranucrase                                                          |
| EC3.3.2.1    | 1.951   | 86.4  | 2.0E-10 | 1.8E-09 | Isochorismatase                                                        |
| EC3.6.3.27   | 0.810   | 171.0 | 2.1E-10 | 1.9E-09 | Phosphate-transporting ATPase                                          |
| EC3.1.1.1    | -1.202  | 167.5 | 2.2E-10 | 2.0E-09 | Carboxylesterase                                                       |
| EC3.1.3.6    | 2.648   | 61.3  | 2.2E-10 | 2.0E-09 | 3'-nucleotidase                                                        |
| EC1.14.12.19 | 3.783   | 52.1  | 2.5E-10 | 2.2E-09 | 3-phenylpropanoate dioxygenase                                         |
| EC5.4.2.9    | -19.392 | 101.6 | 2.7E-10 | 2.4E-09 | Phosphoenolpyruvate mutase                                             |
| EC1.6.5.3    | -0.289  | 349.9 | 2.8E-10 | 2.5E-09 | NADH dehydrogenase (ubiquinone)                                        |
| EC3.2.1.14   | 1.249   | 177.0 | 3.1E-10 | 2.7E-09 | Chitinase                                                              |
| EC2.3.1.157  | 0.812   | 157.2 | 3.1E-10 | 2.7E-09 | Glucosamine-1-phosphate N-acetyltransferase                            |
| EC3.6.3.19   | 3.180   | 62.5  | 3.2E-10 | 2.8E-09 | Maltose-transporting ATPase                                            |
| EC3.5.1.78   | 3.180   | 64.9  | 3.2E-10 | 2.8E-09 | Glutathionylspermidine amidase                                         |

|              |        |       |         |         |                                                         |
|--------------|--------|-------|---------|---------|---------------------------------------------------------|
| EC2.7.2.7    | -1.395 | 140.0 | 3.2E-10 | 2.8E-09 | Butyrate kinase                                         |
| EC1.20.4.1   | 0.959  | 132.1 | 3.9E-10 | 3.3E-09 | Arsenate reductase (glutaredoxin)                       |
| EC2.6.1.66   | 2.226  | 85.6  | 3.9E-10 | 3.3E-09 | Valine--pyruvate transaminase                           |
| EC6.3.3.3    | 2.226  | 72.4  | 3.9E-10 | 3.3E-09 | Dethiobiotin synthase                                   |
| EC2.7.1.45   | -0.712 | 166.8 | 4.0E-10 | 3.3E-09 | 2-dehydro-3-deoxygluconokinase                          |
| EC1.6.4.-    | 1.703  | 105.9 | 4.2E-10 | 3.6E-09 | NA                                                      |
| EC4.1.1.70   | -1.970 | 110.0 | 4.3E-10 | 3.6E-09 | Glutaconyl-CoA decarboxylase                            |
| EC6.1.1.4    | -0.400 | 189.0 | 4.4E-10 | 3.7E-09 | Leucine--tRNA ligase                                    |
| EC3.2.2.23   | 1.632  | 113.0 | 5.0E-10 | 4.1E-09 | DNA-formamidopyrimidine glycosylase                     |
| EC6.1.1.17   | -0.553 | 222.3 | 5.1E-10 | 4.2E-09 | Glutamate--tRNA ligase                                  |
| EC1.17.7.1   | -0.617 | 174.2 | 6.2E-10 | 5.1E-09 | NA                                                      |
| EC2.6.1.62   | 1.265  | 130.7 | 7.5E-10 | 6.1E-09 | Adenosylmethionine--8-amino-7-oxononanoate transaminase |
| EC1.21.4.2   | 0.880  | 220.6 | 8.3E-10 | 6.7E-09 | Glycine reductase                                       |
| EC1.14.-.-   | 1.719  | 108.0 | 8.8E-10 | 7.1E-09 | NA                                                      |
| EC2.4.1.25   | -0.501 | 264.4 | 9.1E-10 | 7.3E-09 | 4-alpha-glucanotransferase                              |
| EC2.7.1.56   | 1.130  | 108.4 | 1.0E-09 | 8.1E-09 | 1-phosphofructokinase                                   |
| EC6.1.1.13   | 1.080  | 153.0 | 1.0E-09 | 8.1E-09 | D-alanine--poly(phosphoribitol) ligase                  |
| EC3.1.2.1    | -1.623 | 122.8 | 1.0E-09 | 8.1E-09 | Acetyl-CoA hydrolase                                    |
| EC2.1.1.13   | -0.469 | 204.3 | 1.0E-09 | 8.2E-09 | Methionine synthase                                     |
| EC2.7.1.60   | 2.424  | 65.8  | 1.1E-09 | 8.7E-09 | N-acylmannosamine kinase                                |
| EC6.2.1.5    | 1.412  | 126.7 | 1.2E-09 | 9.3E-09 | Succinate--CoA ligase (ADP-forming)                     |
| EC1.1.1.27   | 0.918  | 202.8 | 1.2E-09 | 9.3E-09 | L-lactate dehydrogenase                                 |
| EC4.1.1.18   | 0.918  | 192.2 | 1.2E-09 | 9.3E-09 | Lysine decarboxylase                                    |
| EC1.2.1.22   | 1.522  | 105.8 | 1.2E-09 | 9.4E-09 | Lactaldehyde dehydrogenase                              |
| EC1.2.1.70   | 1.474  | 83.1  | 1.2E-09 | 9.5E-09 | Glutamyl-tRNA reductase                                 |
| EC1.1.1.28   | 0.770  | 167.4 | 1.5E-09 | 1.1E-08 | D-lactate dehydrogenase                                 |
| EC2.6.1.57   | 2.571  | 72.9  | 1.7E-09 | 1.3E-08 | Aromatic-amino-acid transaminase                        |
| EC3.5.1.47   | 2.279  | 67.1  | 1.8E-09 | 1.3E-08 | N-acetyldiaminopimelate deacetylase                     |
| EC2.7.1.19   | 20.646 | 35.8  | 1.9E-09 | 1.4E-08 | Phosphoribulokinase                                     |
| EC2.3.3.10   | 19.646 | 60.7  | 1.9E-09 | 1.4E-08 | Hydroxymethylglutaryl-CoA synthase                      |
| EC2.3.1.35   | -0.764 | 206.6 | 1.9E-09 | 1.4E-08 | Glutamate N-acetyltransferase                           |
| EC6.1.1.24   | 1.694  | 144.5 | 2.0E-09 | 1.5E-08 | Glutamate--tRNA(Gln) ligase                             |
| EC4.2.1.40   | 1.694  | 119.8 | 2.0E-09 | 1.5E-08 | Glucarate dehydratase                                   |
| EC1.2.4.1    | 0.874  | 217.6 | 2.1E-09 | 1.5E-08 | Pyruvate dehydrogenase (acetyl-transferring)            |
| EC5.1.3.-    | -0.782 | 172.3 | 2.2E-09 | 1.6E-08 | NA                                                      |
| EC4.1.-.-    | 3.683  | 52.4  | 2.3E-09 | 1.6E-08 | NA                                                      |
| EC3.5.1.28   | 0.403  | 216.6 | 2.4E-09 | 1.7E-08 | N-acetylmuramoyl-L-alanine amidase                      |
| EC3.1.2.-    | 2.159  | 76.1  | 2.6E-09 | 1.9E-08 | NA                                                      |
| EC1.6.5.5    | 1.527  | 100.4 | 2.6E-09 | 1.9E-08 | NADPH:quinone reductase                                 |
| EC2.7.1.58   | 3.089  | 63.6  | 2.7E-09 | 1.9E-08 | 2-dehydro-3-deoxygalactonokinase                        |
| EC1.1.5.3    | 0.575  | 204.4 | 2.9E-09 | 2.1E-08 | NA                                                      |
| EC1.1.1.81   | -1.584 | 127.8 | 3.5E-09 | 2.5E-08 | Hydroxypyruvate reductase                               |
| EC2.6.1.82   | 2.060  | 83.0  | 3.5E-09 | 2.5E-08 | Putrescine aminotransferase                             |
| EC1.1.1.267  | -0.669 | 173.6 | 4.0E-09 | 2.8E-08 | 1-deoxy-D-xylulose-5-phosphate reductoisomerase         |
| EC3.5.1.2    | 1.114  | 138.8 | 4.3E-09 | 3.0E-08 | Glutaminase                                             |
| EC4.1.3.1    | 2.530  | 72.1  | 4.6E-09 | 3.2E-08 | Isocitrate lyase                                        |
| EC2.4.1.7    | 1.454  | 122.8 | 5.6E-09 | 3.9E-08 | Sucrose phosphorylase                                   |
| EC1.2.1.39   | 20.582 | 31.4  | 5.9E-09 | 4.1E-08 | Phenylacetaldehyde dehydrogenase                        |
| EC5.1.3.2    | -0.462 | 192.4 | 6.1E-09 | 4.2E-08 | UDP-glucose 4-epimerase                                 |
| EC4.2.1.-    | -0.482 | 207.9 | 6.5E-09 | 4.4E-08 | NA                                                      |
| EC2.4.1.52   | 2.730  | 93.6  | 6.5E-09 | 4.4E-08 | Poly(glycerol-phosphate) alpha-glucosyltransferase      |
| EC3.5.1.11   | 2.124  | 77.9  | 6.6E-09 | 4.4E-08 | Penicillin amidase                                      |
| EC2.1.2.-    | 2.124  | 91.0  | 6.6E-09 | 4.4E-08 | NA                                                      |
| EC3.4.21.83  | 1.837  | 85.7  | 6.7E-09 | 4.5E-08 | Oligopeptidase B                                        |
| EC2.4.1.15   | 3.628  | 37.8  | 6.8E-09 | 4.6E-08 | Alpha,alpha-trehalose-phosphate synthase (UDP-forming)  |
| EC2.1.1.48   | 3.041  | 51.8  | 7.9E-09 | 5.2E-08 | rRNA (adenine-N(6)-)methyltransferase                   |
| EC3.4.21.102 | -0.570 | 171.2 | 8.4E-09 | 5.5E-08 | C-terminal processing peptidase                         |
| EC2.7.1.53   | 2.026  | 80.3  | 8.8E-09 | 5.8E-08 | L-xylulokinase                                          |
| EC3.1.21.5   | -0.984 | 180.8 | 1.2E-08 | 7.7E-08 | Type III site-specific deoxyribonuclease                |
| EC2.7.4.7    | 0.764  | 160.8 | 1.2E-08 | 7.8E-08 | Phosphomethylpyrimidine kinase                          |
| EC4.1.1.15   | 1.128  | 165.0 | 1.2E-08 | 7.8E-08 | Glutamate decarboxylase                                 |
| EC1.1.1.44   | 0.879  | 187.4 | 1.3E-08 | 8.4E-08 | Phosphogluconate dehydrogenase (decarboxylating)        |
| EC2.3.1.61   | 1.869  | 90.8  | 1.4E-08 | 8.8E-08 | Dihydrolipoyllysine-residue succinyltransferase         |



|             |         |       |         |         |                                                                    |
|-------------|---------|-------|---------|---------|--------------------------------------------------------------------|
| EC2.8.1.1   | 1.869   | 95.7  | 1.4E-08 | 8.8E-08 | Thiosulfate sulfurtransferase                                      |
| EC2.3.3.13  | -0.517  | 189.9 | 1.7E-08 | 1.1E-07 | 2-isopropylmalate synthase                                         |
| EC2.7.1.59  | 20.513  | 31.0  | 1.9E-08 | 1.2E-07 | N-acetylglucosamine kinase                                         |
| EC3.1.27.6  | 20.513  | 41.9  | 1.9E-08 | 1.2E-07 | Enterobacter ribonuclease                                          |
| EC1.2.1.72  | 20.513  | 35.7  | 1.9E-08 | 1.2E-07 | Erythrose-4-phosphate dehydrogenase                                |
| EC4.1.1.68  | 3.571   | 54.5  | 2.1E-08 | 1.3E-07 | 5-oxopent-3-ene-1,2,5-tricarboxylate decarboxylase                 |
| EC2.7.4.1   | 0.652   | 185.8 | 2.2E-08 | 1.4E-07 | Polyphosphate kinase                                               |
| EC1.1.1.6   | 1.367   | 91.9  | 2.3E-08 | 1.5E-07 | Glycerol dehydrogenase                                             |
| EC1.12.7.2  | -0.664  | 197.7 | 2.7E-08 | 1.7E-07 | Ferredoxin hydrogenase                                             |
| EC5.3.1.25  | -0.713  | 214.3 | 3.9E-08 | 2.4E-07 | L-fucose isomerase                                                 |
| EC1.1.2.3   | 2.050   | 76.6  | 4.2E-08 | 2.6E-07 | L-lactate dehydrogenase (cytochrome)                               |
| EC2.2.1.9   | 0.972   | 146.0 | 4.3E-08 | 2.7E-07 | 2-succinyl-5-enolpyruvyl-6-hydroxy-3-cyclohexene-1-carboxylic-acid |
| EC5.3.1.26  | 1.670   | 81.6  | 4.6E-08 | 2.8E-07 | Galactose-6-phosphate isomerase                                    |
| EC3.2.1.20  | -0.481  | 193.9 | 4.8E-08 | 2.9E-07 | Alpha-glucosidase                                                  |
| EC2.7.7.4   | 0.975   | 147.8 | 4.9E-08 | 3.0E-07 | Sulfate adenylyltransferase                                        |
| EC3.4.14.5  | -0.770  | 184.2 | 5.8E-08 | 3.5E-07 | Dipeptidyl-peptidase IV                                            |
| EC1.5.1.7   | -1.098  | 144.9 | 6.0E-08 | 3.6E-07 | Saccharopine dehydrogenase (NAD(+), L-lysine-forming)              |
| EC2.4.1.18  | -0.438  | 205.3 | 6.1E-08 | 3.7E-07 | 1,4-alpha-glucan branching enzyme                                  |
| EC2.7.4.2   | 2.935   | 69.3  | 6.5E-08 | 3.9E-07 | Phosphomevalonate kinase                                           |
| EC6.5.1.4   | 2.935   | 51.8  | 6.5E-08 | 3.9E-07 | RNA-3'-phosphate cyclase                                           |
| EC2.4.1.157 | 1.873   | 109.8 | 6.6E-08 | 3.9E-07 | 1,2-diacylglycerol 3-glucosyltransferase                           |
| EC2.7.8.6   | -0.748  | 174.6 | 7.2E-08 | 4.3E-07 | Undecaprenyl-phosphate galactose phosphotransferase                |
| EC1.1.1.31  | 1.741   | 91.9  | 8.7E-08 | 5.2E-07 | 3-hydroxyisobutyrate dehydrogenase                                 |
| EC1.4.3.21  | 2.396   | 72.6  | 9.1E-08 | 5.4E-07 | Primary-amine oxidase                                              |
| EC4.1.1.33  | 2.396   | 77.7  | 9.1E-08 | 5.4E-07 | Diphosphomevalonate decarboxylase                                  |
| EC1.3.99.2  | -1.047  | 130.3 | 9.7E-08 | 5.7E-07 | Butyryl-CoA dehydrogenase                                          |
| EC1.2.2.2   | 2.011   | 77.4  | 1.0E-07 | 6.0E-07 | Pyruvate dehydrogenase (cytochrome)                                |
| EC4.99.1.1  | 2.011   | 67.3  | 1.0E-07 | 6.0E-07 | Ferrochelatae                                                      |
| EC1.4.99.1  | 2.011   | 65.2  | 1.0E-07 | 6.0E-07 | D-amino-acid dehydrogenase                                         |
| EC3.5.1.19  | 2.011   | 72.9  | 1.0E-07 | 6.0E-07 | Nicotinamidase                                                     |
| EC2.7.1.48  | -0.574  | 173.2 | 1.1E-07 | 6.3E-07 | Uridine kinase                                                     |
| EC1.2.1.8   | 1.596   | 86.5  | 1.1E-07 | 6.3E-07 | Betaine-aldehyde dehydrogenase                                     |
| EC3.4.13.9  | 0.793   | 150.0 | 1.3E-07 | 7.2E-07 | Xaa-Pro dipeptidase                                                |
| EC3.2.1.89  | -1.191  | 137.4 | 1.3E-07 | 7.4E-07 | Arabinogalactan endo-1,4-beta-galactosidase                        |
| EC4.2.1.7   | -0.832  | 139.9 | 1.3E-07 | 7.7E-07 | Altronate dehydratase                                              |
| EC1.18.1.3  | 2.584   | 63.6  | 1.4E-07 | 8.0E-07 | Ferredoxin--NAD(+) reductase                                       |
| EC3.2.1.23  | -0.254  | 290.5 | 1.5E-07 | 8.5E-07 | Beta-galactosidase                                                 |
| EC3.4.17.-  | -2.206  | 88.5  | 1.6E-07 | 8.9E-07 | NA                                                                 |
| EC2.5.1.48  | 1.068   | 138.6 | 1.6E-07 | 8.9E-07 | Cystathionine gamma-synthase                                       |
| EC1.2.7.7   | -19.015 | 80.3  | 1.7E-07 | 9.5E-07 | 3-methyl-2-oxobutanoate dehydrogenase (ferredoxin)                 |
| EC1.14.1.-  | 3.446   | 47.0  | 1.9E-07 | 1.0E-06 | NA                                                                 |
| EC2.7.7.47  | 2.878   | 54.0  | 1.9E-07 | 1.0E-06 | Streptomycin 3"-adenylyltransferase                                |
| EC1.1.1.79  | 20.359  | 28.9  | 1.9E-07 | 1.1E-06 | Glyoxylate reductase (NADP(+))                                     |
| EC1.3.3.3   | 20.359  | 30.2  | 1.9E-07 | 1.1E-06 | Coproporphyrinogen oxidase                                         |
| EC3.1.1.32  | 20.359  | 30.6  | 1.9E-07 | 1.1E-06 | Phospholipase A(1)                                                 |
| EC1.3.1.28  | 20.359  | 31.1  | 1.9E-07 | 1.1E-06 | 2,3-dihydro-2,3-dihydroxybenzoate dehydrogenase                    |
| EC1.14.11.- | 2.082   | 72.4  | 2.0E-07 | 1.1E-06 | NA                                                                 |
| EC3.1.13.1  | 2.082   | 84.9  | 2.0E-07 | 1.1E-06 | Exoribonuclease II                                                 |
| EC2.6.1.19  | 1.187   | 114.3 | 2.5E-07 | 1.4E-06 | 4-aminobutyrate transaminase                                       |
| EC1.1.1.95  | -0.478  | 183.7 | 2.5E-07 | 1.4E-06 | Phosphoglycerate dehydrogenase                                     |
| EC2.6.1.52  | -0.566  | 188.0 | 2.7E-07 | 1.4E-06 | Phosphoserine transaminase                                         |
| EC6.2.1.-   | -0.539  | 240.3 | 2.7E-07 | 1.5E-06 | NA                                                                 |
| EC1.2.1.-   | 1.199   | 133.4 | 2.7E-07 | 1.5E-06 | NA                                                                 |
| EC3.2.1.22  | -0.467  | 188.0 | 2.8E-07 | 1.5E-06 | Alpha-galactosidase                                                |
| EC2.7.1.40  | 0.469   | 216.7 | 3.5E-07 | 1.9E-06 | Pyruvate kinase                                                    |
| EC2.8.4.1   | -18.957 | 79.7  | 3.8E-07 | 2.0E-06 | Coenzyme-B sulfoethylthiotransferase                               |
| EC5.1.3.8   | -1.320  | 116.3 | 4.0E-07 | 2.1E-06 | N-acylglucosamine 2-epimerase                                      |
| EC5.4.2.7   | 0.583   | 167.0 | 4.6E-07 | 2.4E-06 | Phosphopentomutase                                                 |
| EC2.4.2.14  | -0.397  | 220.0 | 4.7E-07 | 2.5E-06 | Amidophosphoribosyltransferase                                     |
| EC2.1.1.144 | 2.818   | 38.9  | 5.4E-07 | 2.8E-06 | Trans-aconitate 2-methyltransferase                                |
| EC2.7.4.23  | 3.377   | 44.8  | 5.6E-07 | 2.9E-06 | Ribose 1,5-bisphosphate phosphokinase                              |
| EC3.1.7.2   | 1.190   | 128.2 | 5.8E-07 | 3.0E-06 | Guanosine-3',5'-bis(diphosphate) 3'-diphosphatase                  |
| EC3.5.4.12  | -0.779  | 148.6 | 5.8E-07 | 3.0E-06 | dCMP deaminase                                                     |

|              |         |       |         |         |                                                                |
|--------------|---------|-------|---------|---------|----------------------------------------------------------------|
| EC2.7.1.87   | 20.272  | 41.8  | 6.3E-07 | 3.2E-06 | Streptomycin 3"-kinase                                         |
| EC3.6.3.33   | 20.272  | 30.7  | 6.3E-07 | 3.2E-06 | Vitamin B12-transporting ATPase                                |
| EC4.1.3.30   | 1.928   | 70.1  | 6.4E-07 | 3.3E-06 | Methylisocitrate lyase                                         |
| EC1.2.1.60   | 2.296   | 53.4  | 6.5E-07 | 3.3E-06 | 5-carboxymethyl-2-hydroxymuconic-semialdehyde dehydrogenase    |
| EC4.1.1.41   | -0.808  | 155.2 | 6.7E-07 | 3.4E-06 | Methylmalonyl-CoA decarboxylase                                |
| EC6.1.1.12   | -0.383  | 209.7 | 7.0E-07 | 3.5E-06 | Aspartate--tRNA ligase                                         |
| EC3.6.1.-    | 0.118   | 271.9 | 8.1E-07 | 4.1E-06 | NA                                                             |
| EC3.1.3.11   | 0.476   | 181.7 | 8.8E-07 | 4.5E-06 | Fructose-bisphosphatase                                        |
| EC2.7.7.13   | -1.500  | 98.9  | 9.5E-07 | 4.8E-06 | Mannose-1-phosphate guanylyltransferase                        |
| EC3.6.1.45   | 1.401   | 115.2 | 1.1E-06 | 5.7E-06 | UDP-sugar diphosphatase                                        |
| EC2.3.1.29   | -0.674  | 151.5 | 1.1E-06 | 5.7E-06 | Glycine C-acetyltransferase                                    |
| EC2.4.1.83   | -1.090  | 123.5 | 1.2E-06 | 5.9E-06 | Dolichyl-phosphate beta-D-mannosyltransferase                  |
| EC2.1.1.51   | 1.194   | 87.9  | 1.3E-06 | 6.6E-06 | rRNA (guanine-N(1)-)-methyltransferase                         |
| EC1.4.1.13   | -0.248  | 331.0 | 1.3E-06 | 6.6E-06 | Glutamate synthase (NADPH)                                     |
| EC1.4.1.14   | -0.248  | 331.0 | 1.3E-06 | 6.6E-06 | Glutamate synthase (NADH)                                      |
| EC3.2.1.91   | -2.375  | 86.2  | 1.5E-06 | 7.4E-06 | Cellulose 1,4-beta-cellobiosidase                              |
| EC3.1.21.7   | 2.753   | 43.8  | 1.5E-06 | 7.5E-06 | Deoxyribonuclease V                                            |
| EC2.7.2.15   | 3.303   | 40.7  | 1.7E-06 | 8.2E-06 | Propionate kinase                                              |
| EC3.5.3.9    | 2.242   | 59.3  | 1.7E-06 | 8.3E-06 | Allantoate deiminase                                           |
| EC3.6.1.41   | 2.242   | 57.8  | 1.7E-06 | 8.3E-06 | Bis(5'-nucleosyl)-tetrphosphatase (symmetrical)                |
| EC2.7.1.15   | 0.750   | 150.3 | 1.9E-06 | 9.1E-06 | Ribokinase                                                     |
| EC1.1.1.169  | 0.895   | 138.6 | 1.9E-06 | 9.3E-06 | 2-dehydropantoate 2-reductase                                  |
| EC4.2.1.80   | 20.176  | 29.3  | 2.0E-06 | 9.7E-06 | 2-oxopent-4-enoate hydratase                                   |
| EC6.3.1.11   | 20.176  | 28.4  | 2.0E-06 | 9.7E-06 | Glutamate--putrescine ligase                                   |
| EC3.5.1.96   | 20.176  | 29.5  | 2.0E-06 | 9.7E-06 | Succinylglutamate desuccinylase                                |
| EC1.17.4.2   | -0.280  | 316.5 | 2.0E-06 | 9.7E-06 | Ribonucleoside-triphosphate reductase                          |
| EC3.1.26.4   | -0.459  | 167.0 | 2.1E-06 | 9.9E-06 | Ribonuclease H                                                 |
| EC6.1.1.19   | -0.389  | 173.1 | 2.5E-06 | 1.2E-05 | Arginine--tRNA ligase                                          |
| EC4.2.1.46   | -0.408  | 172.2 | 2.7E-06 | 1.3E-05 | dTDP-glucose 4,6-dehydratase                                   |
| EC3.1.21.1   | 2.412   | 52.1  | 2.9E-06 | 1.4E-05 | Deoxyribonuclease I                                            |
| EC1.5.1.12   | 0.738   | 174.7 | 3.0E-06 | 1.4E-05 | 1-pyrroline-5-carboxylate dehydrogenase                        |
| EC2.7.1.-    | 0.417   | 193.1 | 3.1E-06 | 1.5E-05 | NA                                                             |
| EC4.4.1.-    | 1.942   | 78.6  | 3.1E-06 | 1.5E-05 | NA                                                             |
| EC1.1.1.17   | 1.213   | 109.4 | 3.3E-06 | 1.5E-05 | Mannitol-1-phosphate 5-dehydrogenase                           |
| EC3.5.1.-    | -0.386  | 167.0 | 3.5E-06 | 1.6E-05 | NA                                                             |
| EC1.12.98.1  | -2.845  | 80.7  | 4.1E-06 | 1.9E-05 | Coenzyme F420 hydrogenase                                      |
| EC4.2.1.24   | 0.884   | 119.5 | 4.3E-06 | 2.0E-05 | Porphobilinogen synthase                                       |
| EC4.2.99.20  | 2.684   | 42.9  | 4.3E-06 | 2.0E-05 | 2-succinyl-6-hydroxy-2,4-cyclohexadiene-1-carboxylate synthase |
| EC2.7.7.23   | 0.558   | 157.7 | 4.7E-06 | 2.2E-05 | UDP-N-acetylglucosamine diphosphorylase                        |
| EC3.5.3.6    | 0.917   | 114.7 | 4.8E-06 | 2.2E-05 | Arginine deiminase                                             |
| EC2.6.1.83   | -0.744  | 181.7 | 5.0E-06 | 2.3E-05 | LL-diaminopimelate aminotransferase                            |
| EC4.2.3.5    | -0.474  | 178.7 | 5.1E-06 | 2.3E-05 | Chorismate synthase                                            |
| EC3.4.21.107 | 1.559   | 90.3  | 5.3E-06 | 2.4E-05 | Peptidase Do                                                   |
| EC1.8.4.11   | 1.431   | 82.7  | 5.4E-06 | 2.5E-05 | Peptide-methionine (S)-S-oxide reductase                       |
| EC3.1.3.27   | 1.511   | 78.1  | 5.4E-06 | 2.5E-05 | Phosphatidylglycerophosphatase                                 |
| EC6.1.1.22   | -0.444  | 178.1 | 6.0E-06 | 2.7E-05 | Asparagine--tRNA ligase                                        |
| EC3.2.1.35   | 0.961   | 145.6 | 6.0E-06 | 2.7E-05 | Hyaluronoglucosaminidase                                       |
| EC1.1.1.90   | 2.019   | 70.8  | 6.1E-06 | 2.7E-05 | Aryl-alcohol dehydrogenase                                     |
| EC3.2.2.8    | 2.019   | 63.0  | 6.1E-06 | 2.7E-05 | Ribosylpyrimidine nucleosidase                                 |
| EC6.1.1.21   | -0.426  | 157.4 | 6.4E-06 | 2.9E-05 | Histidine--tRNA ligase                                         |
| EC1.5.3.-    | 20.071  | 28.8  | 6.6E-06 | 2.9E-05 | NA                                                             |
| EC3.5.1.25   | 0.462   | 159.6 | 7.5E-06 | 3.3E-05 | N-acetylglucosamine-6-phosphate deacetylase                    |
| EC1.14.14.5  | 1.891   | 63.4  | 7.6E-06 | 3.4E-05 | Alkanesulfonate monooxygenase                                  |
| EC6.3.5.1    | -0.456  | 211.5 | 7.7E-06 | 3.4E-05 | NAD(+) synthase (glutamine-hydrolyzing)                        |
| EC6.1.1.1    | -0.436  | 162.0 | 8.4E-06 | 3.7E-05 | Tyrosine--tRNA ligase                                          |
| EC2.3.1.48   | 1.259   | 116.1 | 8.9E-06 | 3.9E-05 | Histone acetyltransferase                                      |
| EC2.5.1.6    | -0.336  | 207.5 | 9.0E-06 | 4.0E-05 | Methionine adenosyltransferase                                 |
| EC6.4.1.1    | 0.424   | 299.5 | 9.2E-06 | 4.0E-05 | Pyruvate carboxylase                                           |
| EC3.8.1.-    | -0.933  | 118.7 | 9.2E-06 | 4.0E-05 | NA                                                             |
| EC2.1.1.86   | -18.679 | 64.5  | 9.9E-06 | 4.3E-05 | Tetrahydromethanopterin S-methyltransferase                    |
| EC3.2.1.93   | 0.847   | 120.5 | 1.1E-05 | 4.6E-05 | Alpha, alpha-phosphotrehalase                                  |
| EC1.1.1.88   | 1.632   | 96.8  | 1.1E-05 | 4.7E-05 | Hydroxymethylglutaryl-CoA reductase                            |
| EC2.2.1.1    | -0.275  | 202.6 | 1.2E-05 | 5.0E-05 | Transketolase                                                  |

|              |         |       |         |         |                                                              |
|--------------|---------|-------|---------|---------|--------------------------------------------------------------|
| EC2.7.9.3    | 0.825   | 145.5 | 1.2E-05 | 5.0E-05 | Selenide, water dikinase                                     |
| EC1.3.1.-    | 0.652   | 137.4 | 1.2E-05 | 5.0E-05 | NA                                                           |
| EC3.1.13.5   | 1.431   | 89.4  | 1.2E-05 | 5.0E-05 | Ribonuclease D                                               |
| EC4.1.1.8    | 1.431   | 87.0  | 1.2E-05 | 5.0E-05 | Oxalyl-CoA decarboxylase                                     |
| EC6.2.1.26   | 1.060   | 119.3 | 1.3E-05 | 5.3E-05 | o-succinylbenzoate--CoA ligase                               |
| EC6.4.1.3    | -0.513  | 183.1 | 1.3E-05 | 5.5E-05 | Propionyl-CoA carboxylase                                    |
| EC1.2.99.7   | -1.313  | 126.7 | 1.3E-05 | 5.6E-05 | Aldehyde dehydrogenase (FAD-independent)                     |
| EC3.5.1.53   | -1.372  | 107.7 | 1.3E-05 | 5.7E-05 | N-carbamoylputrescine amidase                                |
| EC2.7.10.-   | 0.912   | 125.9 | 1.4E-05 | 5.9E-05 | NA                                                           |
| EC2.5.1.8    | -0.479  | 158.4 | 1.4E-05 | 6.0E-05 | tRNA isopentenyltransferase                                  |
| EC1.1.1.205  | -0.335  | 218.4 | 1.5E-05 | 6.1E-05 | IMP dehydrogenase                                            |
| EC3.1.1.5    | 1.190   | 91.1  | 1.5E-05 | 6.2E-05 | Lysophospholipase                                            |
| EC4.1.3.40   | 3.136   | 43.8  | 1.5E-05 | 6.2E-05 | Chorismate lyase                                             |
| EC6.3.-.-    | 3.136   | 38.6  | 1.5E-05 | 6.2E-05 | NA                                                           |
| EC4.2.1.1    | 0.828   | 143.0 | 1.5E-05 | 6.3E-05 | Carbonate dehydratase                                        |
| EC3.4.19.5   | 1.208   | 124.0 | 1.6E-05 | 6.7E-05 | Beta-aspartyl-peptidase                                      |
| EC1.2.7.5    | 0.677   | 180.0 | 1.8E-05 | 7.2E-05 | Aldehyde ferredoxin oxidoreductase                           |
| EC6.1.1.10   | -0.302  | 202.2 | 1.8E-05 | 7.3E-05 | Methionine--tRNA ligase                                      |
| EC6.1.1.9    | -0.268  | 208.2 | 1.8E-05 | 7.3E-05 | Valine--tRNA ligase                                          |
| EC6.1.1.7    | -0.285  | 203.2 | 1.8E-05 | 7.4E-05 | Alanine--tRNA ligase                                         |
| EC2.4.1.1    | -0.265  | 254.3 | 1.8E-05 | 7.4E-05 | Phosphorylase                                                |
| EC4.1.3.-    | -0.633  | 136.7 | 1.8E-05 | 7.5E-05 | NA                                                           |
| EC4.6.1.12   | -0.696  | 155.4 | 1.9E-05 | 7.6E-05 | 2-C-methyl-D-erythritol 2,4-cyclodiphosphate synthase        |
| EC2.7.2.3    | -0.384  | 190.3 | 2.0E-05 | 8.0E-05 | Phosphoglycerate kinase                                      |
| EC3.2.1.10   | 0.648   | 198.1 | 2.0E-05 | 8.2E-05 | Oligo-1,6-glucosidase                                        |
| EC2.6.1.81   | 2.279   | 48.0  | 2.1E-05 | 8.4E-05 | Succinylornithine transaminase                               |
| EC1.13.11.15 | 19.953  | 26.1  | 2.1E-05 | 8.6E-05 | 3,4-dihydroxyphenylacetate 2,3-dioxygenase                   |
| EC1.13.11.16 | 19.953  | 24.6  | 2.1E-05 | 8.6E-05 | 3-carboxyethylcatechol 2,3-dioxygenase                       |
| EC2.3.1.1    | -0.490  | 175.1 | 2.2E-05 | 8.8E-05 | Amino-acid N-acetyltransferase                               |
| EC5.3.1.12   | -0.549  | 159.5 | 2.2E-05 | 8.9E-05 | Glucuronate isomerase                                        |
| EC4.1.2.21   | 1.654   | 82.4  | 2.3E-05 | 9.2E-05 | 2-dehydro-3-deoxy-6-phosphogalactonate aldolase              |
| EC3.2.1.96   | 1.654   | 66.3  | 2.3E-05 | 9.2E-05 | Mannosyl-glycoprotein endo-beta-N-acetylglucosaminidase      |
| EC4.3.1.17   | 0.384   | 212.5 | 2.4E-05 | 9.3E-05 | L-serine ammonia-lyase                                       |
| EC1.97.1.9   | 0.738   | 144.4 | 2.4E-05 | 9.4E-05 | Selenate reductase                                           |
| EC5.3.1.22   | 1.585   | 80.0  | 2.5E-05 | 9.7E-05 | Hydroxypyruvate isomerase                                    |
| EC1.1.1.34   | 1.527   | 112.8 | 2.5E-05 | 1.0E-04 | Hydroxymethylglutaryl-CoA reductase (NADPH)                  |
| EC5.3.1.1    | -0.468  | 173.8 | 2.6E-05 | 1.0E-04 | Triose-phosphate isomerase                                   |
| EC2.7.7.10   | 0.685   | 180.4 | 3.0E-05 | 1.2E-04 | UTP--hexose-1-phosphate uridylyltransferase                  |
| EC2.5.1.-    | 0.435   | 205.2 | 3.1E-05 | 1.2E-04 | NA                                                           |
| EC5.3.1.23   | -1.066  | 109.5 | 3.1E-05 | 1.2E-04 | S-methyl-5-thioribose-1-phosphate isomerase                  |
| EC3.6.1.1    | -0.344  | 208.9 | 3.2E-05 | 1.3E-04 | Inorganic diphosphatase                                      |
| EC2.1.1.113  | -18.551 | 72.6  | 3.4E-05 | 1.3E-04 | Site-specific DNA-methyltransferase (cytosine-N(4)-specific) |
| EC1.2.7.1    | -0.715  | 160.7 | 3.5E-05 | 1.3E-04 | Pyruvate synthase                                            |
| EC4.2.1.47   | -0.773  | 150.6 | 3.5E-05 | 1.3E-04 | GDP-mannose 4,6-dehydratase                                  |
| EC1.1.1.29   | -0.733  | 146.6 | 3.5E-05 | 1.3E-04 | Glycerate dehydrogenase                                      |
| EC4.2.2.2    | -1.704  | 94.6  | 3.5E-05 | 1.4E-04 | Pectate lyase                                                |
| EC2.7.1.89   | 3.041   | 35.9  | 4.5E-05 | 1.7E-04 | Thiamine kinase                                              |
| EC2.8.1.2    | 3.041   | 38.5  | 4.5E-05 | 1.7E-04 | 3-mercaptopyruvate sulfurtransferase                         |
| EC3.5.1.94   | 3.041   | 41.7  | 4.5E-05 | 1.7E-04 | Gamma-glutamyl-gamma-aminobutyrate hydrolase                 |
| EC1.1.1.23   | -0.485  | 171.7 | 5.2E-05 | 2.0E-04 | Histidinol dehydrogenase                                     |
| EC2.1.1.35   | 1.351   | 66.9  | 5.2E-05 | 2.0E-04 | tRNA (uracil-5-)-methyltransferase                           |
| EC4.1.1.49   | -0.402  | 180.3 | 5.2E-05 | 2.0E-04 | Phosphoenolpyruvate carboxykinase (ATP)                      |
| EC1.2.99.5   | -1.852  | 92.9  | 5.5E-05 | 2.1E-04 | Formylmethanofuran dehydrogenase                             |
| EC2.7.7.1    | 1.480   | 86.7  | 5.6E-05 | 2.1E-04 | Nicotinamide-nucleotide adenyltransferase                    |
| EC3.6.3.20   | 1.480   | 63.8  | 5.6E-05 | 2.1E-04 | Glycerol-3-phosphate-transporting ATPase                     |
| EC2.7.7.-    | 0.293   | 226.0 | 5.8E-05 | 2.2E-04 | NA                                                           |
| EC4.1.1.82   | -2.629  | 77.7  | 5.9E-05 | 2.2E-04 | Phosphonopyruvate decarboxylase                              |
| EC3.2.1.31   | -0.829  | 128.7 | 5.9E-05 | 2.2E-04 | Beta-glucuronidase                                           |
| EC2.7.7.24   | -0.462  | 165.5 | 6.0E-05 | 2.2E-04 | Glucose-1-phosphate thymidyltransferase                      |
| EC2.6.1.42   | -0.447  | 158.6 | 7.0E-05 | 2.6E-04 | Branched-chain-amino-acid transaminase                       |
| EC1.1.3.21   | 19.820  | 23.4  | 7.0E-05 | 2.6E-04 | Glycerol-3-phosphate oxidase                                 |
| EC3.1.3.23   | 19.820  | 25.6  | 7.0E-05 | 2.6E-04 | Sugar-phosphatase                                            |
| EC3.2.1.41   | -0.621  | 203.8 | 7.0E-05 | 2.6E-04 | Pullulanase                                                  |

|              |         |       |         |         |                                                            |
|--------------|---------|-------|---------|---------|------------------------------------------------------------|
| EC3.1.21.4   | -0.597  | 192.0 | 7.4E-05 | 2.7E-04 | Type II site-specific deoxyribonuclease                    |
| EC2.1.1.148  | -1.277  | 108.1 | 7.5E-05 | 2.7E-04 | Thymidylate synthase (FAD)                                 |
| EC2.5.1.1    | -1.127  | 107.8 | 7.6E-05 | 2.8E-04 | Dimethylallyltransferase                                   |
| EC2.7.1.36   | 1.991   | 73.5  | 7.6E-05 | 2.8E-04 | Mevalonate kinase                                          |
| EC3.5.4.25   | -0.606  | 179.6 | 7.9E-05 | 2.9E-04 | GTP cyclohydrolase II                                      |
| EC2.5.1.61   | 0.888   | 94.1  | 8.1E-05 | 2.9E-04 | Hydroxymethylbilane synthase                               |
| EC3.1.26.-   | -0.610  | 147.8 | 8.1E-05 | 2.9E-04 | NA                                                         |
| EC2.5.1.7    | -0.294  | 213.0 | 8.6E-05 | 3.1E-04 | UDP-N-acetylglucosamine 1-carboxyvinyltransferase          |
| EC1.6.1.2    | 0.722   | 162.4 | 8.8E-05 | 3.2E-04 | NAD(P)(+) transhydrogenase (AB-specific)                   |
| EC3.1.2.14   | 1.837   | 66.9  | 9.3E-05 | 3.3E-04 | Oleoyl-[acyl-carrier-protein] hydrolase                    |
| EC3.2.1.25   | -0.683  | 150.8 | 1.1E-04 | 3.9E-04 | Beta-mannosidase                                           |
| EC3.2.1.24   | 0.476   | 162.0 | 1.1E-04 | 4.1E-04 | Alpha-mannosidase                                          |
| EC1.1.1.58   | -0.718  | 136.9 | 1.1E-04 | 4.1E-04 | Tagaturonate reductase                                     |
| EC1.1.1.284  | 1.344   | 79.2  | 1.1E-04 | 4.1E-04 | S-(hydroxymethyl)glutathione dehydrogenase                 |
| EC2.7.7.38   | -0.882  | 140.3 | 1.2E-04 | 4.2E-04 | 3-deoxy-manno-octulosonate cytidylyltransferase            |
| EC3.1.1.-    | 0.550   | 162.5 | 1.2E-04 | 4.2E-04 | NA                                                         |
| EC2.7.1.107  | 1.549   | 55.5  | 1.2E-04 | 4.2E-04 | Diacylglycerol kinase                                      |
| EC2.7.8.7    | 1.549   | 57.0  | 1.2E-04 | 4.2E-04 | Holo-[acyl-carrier-protein] synthase                       |
| EC4.1.1.12   | 1.431   | 70.4  | 1.2E-04 | 4.3E-04 | Aspartate 4-decarboxylase                                  |
| EC3.1.26.8   | 1.485   | 88.2  | 1.2E-04 | 4.3E-04 | Ribonuclease M5                                            |
| EC2.3.1.8    | 0.374   | 178.7 | 1.3E-04 | 4.7E-04 | Phosphate acetyltransferase                                |
| EC3.4.21.92  | -0.376  | 206.4 | 1.4E-04 | 4.7E-04 | Endopeptidase Clp                                          |
| EC2.7.2.1    | -0.308  | 190.8 | 1.4E-04 | 4.8E-04 | Acetate kinase                                             |
| EC3.4.21.26  | -1.481  | 108.8 | 1.4E-04 | 4.9E-04 | Prolyl oligopeptidase                                      |
| EC1.11.1.15  | 0.580   | 150.4 | 1.4E-04 | 4.9E-04 | Peroxiredoxin                                              |
| EC5.3.1.14   | -0.603  | 159.2 | 1.4E-04 | 5.0E-04 | L-rhamnose isomerase                                       |
| EC1.4.3.-    | 2.124   | 44.4  | 1.5E-04 | 5.1E-04 | NA                                                         |
| EC3.1.1.53   | -0.655  | 171.6 | 1.5E-04 | 5.2E-04 | Sialate O-acetyltransferase                                |
| EC6.1.1.11   | -0.349  | 164.7 | 1.5E-04 | 5.2E-04 | Serine--tRNA ligase                                        |
| EC3.4.24.64  | 1.163   | 97.5  | 1.6E-04 | 5.5E-04 | Mitochondrial processing peptidase                         |
| EC3.2.1.81   | -18.350 | 59.0  | 1.8E-04 | 6.1E-04 | Beta-agarase                                               |
| EC2.4.2.29   | -0.363  | 176.2 | 1.8E-04 | 6.2E-04 | tRNA-guanine transglycosylase                              |
| EC4.3.1.15   | 0.872   | 101.3 | 1.8E-04 | 6.2E-04 | Diaminopropionate ammonia-lyase                            |
| EC3.4.21.116 | -0.861  | 151.2 | 1.8E-04 | 6.3E-04 | SpoIVB peptidase                                           |
| EC3.1.1.3    | -1.459  | 95.5  | 1.9E-04 | 6.4E-04 | Triacylglycerol lipase                                     |
| EC1.18.6.1   | -1.362  | 103.4 | 1.9E-04 | 6.5E-04 | Nitrogenase                                                |
| EC2.7.1.49   | 0.562   | 158.6 | 2.0E-04 | 6.8E-04 | Hydroxymethylpyrimidine kinase                             |
| EC4.1.1.19   | 0.459   | 203.8 | 2.1E-04 | 7.1E-04 | Arginine decarboxylase                                     |
| EC4.3.1.19   | 0.461   | 154.5 | 2.2E-04 | 7.5E-04 | Threonine ammonia-lyase                                    |
| EC3.1.25.-   | 20.666  | 20.2  | 2.3E-04 | 7.8E-04 | NA                                                         |
| EC3.6.1.26   | 20.666  | 21.6  | 2.3E-04 | 7.8E-04 | CDP-diacylglycerol diphosphatase                           |
| EC2.1.4.1    | 19.666  | 25.4  | 2.3E-04 | 7.8E-04 | Glycine amidinotransferase                                 |
| EC3.1.11.3   | 19.666  | 22.7  | 2.3E-04 | 7.8E-04 | Exodeoxyribonuclease (lambda-induced)                      |
| EC3.1.4.14   | 19.666  | 22.7  | 2.3E-04 | 7.8E-04 | [Acyl-carrier-protein] phosphodiesterase                   |
| EC3.4.23.49  | 19.666  | 22.7  | 2.3E-04 | 7.8E-04 | Omptin                                                     |
| EC5.3.4.1    | 1.654   | 55.7  | 2.5E-04 | 8.3E-04 | Protein disulfide-isomerase                                |
| EC1.4.4.2    | -0.288  | 259.2 | 2.5E-04 | 8.4E-04 | Glycine dehydrogenase (decarboxylating)                    |
| EC2.7.1.5    | -0.520  | 143.5 | 2.6E-04 | 8.6E-04 | Rhamnulokinase                                             |
| EC3.1.4.-    | 2.348   | 36.3  | 2.6E-04 | 8.7E-04 | NA                                                         |
| EC3.6.1.7    | 1.431   | 60.6  | 2.7E-04 | 8.8E-04 | Acylphosphatase                                            |
| EC6.-.-      | 1.492   | 62.3  | 2.7E-04 | 8.8E-04 | NA                                                         |
| EC2.3.1.40   | 0.843   | 134.5 | 2.7E-04 | 8.8E-04 | Acyl-[acyl-carrier-protein]-phospholipid O-acyltransferase |
| EC3.6.3.17   | 0.211   | 262.0 | 2.7E-04 | 8.8E-04 | Monosaccharide-transporting ATPase                         |
| EC2.7.1.16   | -0.420  | 175.7 | 2.7E-04 | 8.9E-04 | Ribulokinase                                               |
| EC6.3.5.5    | -0.163  | 277.9 | 2.8E-04 | 9.0E-04 | Carbamoyl-phosphate synthase (glutamine-hydrolyzing)       |
| EC1.3.1.34   | 0.686   | 127.2 | 2.8E-04 | 9.2E-04 | 2,4-dienoyl-CoA reductase (NADPH)                          |
| EC1.1.1.69   | -0.689  | 139.6 | 3.0E-04 | 9.7E-04 | Gluconate 5-dehydrogenase                                  |

**Table S5.**

E.C.s encoded by genes whose representation is significantly different between herbivorous and carnivorous microbiomes. \* = Poisson model coefficient. † = Akaike Information Criterion, smaller values denote better agreement between model and data. ‡ = Benjamini-Hochberg corrected. § = "NA" E.C. with no specific annotation.

| <b>Amino Acid</b>       | <b>Biosynthetic Reactions</b>                                                                                | <b>Degradative Reactions</b>                               | <b>Reversible Reactions</b>                  |
|-------------------------|--------------------------------------------------------------------------------------------------------------|------------------------------------------------------------|----------------------------------------------|
| Alanine                 | No difference                                                                                                | No difference                                              |                                              |
| Arginine                | 2.3.1.1, 2.3.1.35 (Both increased in Herbivores)                                                             | 3.5.3.6 (Carnivores)                                       |                                              |
| Asparagine              | No difference                                                                                                | No difference                                              |                                              |
| Aspartic Acid           | No difference                                                                                                | 4.1.1.12 (Carnivores)                                      | 2.6.1.1 (Herbivores)                         |
| Cysteine                | 2.5.1.49 (Herbivores)                                                                                        | No difference                                              |                                              |
| Glutamic Acid           | 1.4.1.4, 1.4.1.13, 1.4.1.14 (All increased in Herbivores)                                                    | 4.1.1.15, 2.6.1.19, 1.2.1.16 (All increased in Carnivores) |                                              |
| Glutamine               | 6.3.1.2 (Herbivore)                                                                                          | 3.5.1.2 (Carnivores)                                       |                                              |
| Glycine                 | 2.1.2.1 (Herbivores)                                                                                         | No difference                                              |                                              |
| Histidine               | 1.1.1.23 (Herbivores)                                                                                        | No difference                                              |                                              |
| Isoleucine              | No difference                                                                                                | 1.2.7.7, 1.2.4.4, 1.3.99.2 (All increased in Herbivores)   | 2.6.1.42 (Herbivores)                        |
| Leucine                 | No difference                                                                                                | 1.2.7.7, 1.2.4.4 (Both increased in Herbivores)            | 2.6.1.42 (Herbivores)                        |
| Lysine                  | 1.5.1.7, 3.5.1.- (Both increased in Herbivores)                                                              | 4.1.1.8 (Carnivores)                                       |                                              |
| Methionine              | 2.1.1.13 (Herbivores), S-adenosyl-L-methionine cycle [2.5.1.6,2.1.1.37,3.3.1.1](All increased in Herbivores) | No difference                                              | 2.1.1.14 (Carnivores)                        |
| Phenylalanine           | 4.2.3.5 (Herbivores)                                                                                         | No difference                                              | 2.6.1.1 (Herbivores), 2.6.1.57 (Carnivores)  |
| Proline                 | No difference                                                                                                | 1.5.99.8, 1.5.1.12 (Both increased in Carnivores)          |                                              |
| Serine                  | 1.1.1.95, 2.6.1.52 (Both increased in Herbivores)                                                            | 4.3.1.17, 4.3.1.19 (Both increased in Carnivores)          |                                              |
| Threonine               | No difference                                                                                                | 4.3.1.19 (Carnivores)                                      |                                              |
| Tryptophan              | 4.2.3.5 (Herbivores), 4.2.1.20(Herbivores)                                                                   | 1.14.13.- (Carnivores), 2.5.1.- (Carnivores)               |                                              |
| Tyrosine                | 4.2.3.5 (Herbivores)                                                                                         | No difference                                              | 2.6.1.1 (Herbivores), 2.6.1.57 (Carnivores)  |
| Valine                  | No difference                                                                                                | 1.2.7.7, 1.2.4.4, 1.3.99.2 (All increased in Herbivores)   | 2.6.1.42 (Herbivores), 2.6.1.66 (Carnivores) |
| <b>Herbivore Total:</b> | <b>12</b>                                                                                                    | <b>3</b>                                                   | <b>6</b>                                     |
| <b>Carnivore Total:</b> | <b>0</b>                                                                                                     | <b>9</b>                                                   | <b>4</b>                                     |

**Table S6.**

Summary of differences in amino acid metabolism between herbivore and carnivore microbiomes.

| SampleID | BMI<br>(kg/m <sup>2</sup> ) | Total Carbo-<br>hydrate<br>(g/day) | Total Protein<br>(g/day) | Insoluble<br>Dietary Fiber<br>(g/day) |
|----------|-----------------------------|------------------------------------|--------------------------|---------------------------------------|
| CRBM.02  | 18.5                        | 227.3                              | 68.4                     | 24.6                                  |
| CRBM.03  | 20.1                        | 302.9                              | 94                       | 48.8                                  |
| CRBM.04  | 18.5                        | 217.6                              | 92.8                     | 42.7                                  |
| CRBM.05  | 19.4                        | 378.2                              | 69.3                     | 62.7                                  |
| CRBM.06  | 19.7                        | 276.5                              | 71.5                     | 50.8                                  |
| CRBM.07  | 19.2                        | 130.1                              | 56.4                     | 18.5                                  |
| CRBM.08  | 16.7                        | 216.7                              | 62.1                     | 40                                    |
| CRBM.09  | 18.7                        | 257.2                              | 116.6                    | 37                                    |
| CRBM.10  | 19.4                        | 102                                | 145.6                    | 30.7                                  |
| CRBM.11  | 18.3                        | 253.1                              | 64.5                     | 19.7                                  |
| CRBM.12  | 20.3                        | 195.7                              | 78.8                     | 38.6                                  |
| CRBM.13  | 17.5                        | 169.6                              | 61.9                     | 29.8                                  |
| CRBM.14  | 22.5                        | 168.4                              | 41.6                     | 22.9                                  |
| CRBM.15  | 22.2                        | 125.3                              | 70.7                     | 15.3                                  |
| CRBM.16  | 20.1                        | 341.9                              | 88                       | 77.7                                  |
| CRBM.19  | 19.5                        | 194.7                              | 69.6                     | 32.1                                  |
| CRBM.20  | 18.6                        | 216                                | 47.3                     | 20.5                                  |
| CRBM.21  | 20.6                        | 203.7                              | 79.1                     | 17.2                                  |

**Table S7.**

Metadata on 18 calorie restricted humans included in this study, including host BMI and intake of major food categories.

| SampleID | Total 16S rRNA V2 reads<br>(De-noised, Chimera Checked) | Total OTUs (97% ID) | Shannon's Index* |
|----------|---------------------------------------------------------|---------------------|------------------|
| CRBM.02  | 2159                                                    | 350                 | 6.52             |
| CRBM.03  | 3279                                                    | 421                 | 6.71             |
| CRBM.04  | 2365                                                    | 407                 | 6.70             |
| CRBM.05  | 3614                                                    | 379                 | 6.38             |
| CRBM.06  | 2716                                                    | 443                 | 6.77             |
| CRBM.07  | 18818                                                   | 917                 | 6.81             |
| CRBM.08  | 3240                                                    | 365                 | 6.14             |
| CRBM.09  | 2431                                                    | 328                 | 6.34             |
| CRBM.10  | 3610                                                    | 337                 | 6.32             |
| CRBM.11  | 2311                                                    | 360                 | 6.32             |
| CRBM.12  | 2695                                                    | 418                 | 6.96             |
| CRBM.13  | 2350                                                    | 303                 | 6.05             |
| CRBM.14  | 2855                                                    | 316                 | 5.77             |
| CRBM.15  | 2317                                                    | 383                 | 6.37             |
| CRBM.16  | 3274                                                    | 215                 | 5.18             |
| CRBM.19  | 2274                                                    | 327                 | 6.05             |
| CRBM.20  | 3415                                                    | 440                 | 6.77             |
| CRBM.21  | 1826                                                    | 302                 | 6.09             |

\* average of 50 iterations at 1500 reads per sample

**Table S8.**

16S rRNA sequencing statistics from calorie restricted humans

| SampleID | Sequencing chemistry | Total shotgun reads (quality filtered, dereplicated) | Mean read length ( $\pm$ standard deviation) [nt] | Number of reads with KEGG Orthology group (KO) assignment | Total E.C. assignments | Number of reads with MEROPS assignment | Number of reads with CAZy assignment* |
|----------|----------------------|------------------------------------------------------|---------------------------------------------------|-----------------------------------------------------------|------------------------|----------------------------------------|---------------------------------------|
| CRBM.02  | FLX                  | 46535                                                | 226 ( $\pm$ 45)                                   | 15017                                                     | 9811                   | 1042                                   | 1234                                  |
| CRBM.03  | FLX                  | 92140                                                | 222 ( $\pm$ 46)                                   | 30057                                                     | 20019                  | 2161                                   | 2381                                  |
| CRBM.04  | FLX                  | 35735                                                | 227 ( $\pm$ 42)                                   | 10993                                                     | 7294                   | 771                                    | 896                                   |
| CRBM.05  | FLX                  | 152547                                               | 217 ( $\pm$ 44)                                   | 49629                                                     | 33199                  | 3466                                   | 4426                                  |
| CRBM.06  | FLX                  | 33800                                                | 232 ( $\pm$ 36)                                   | 10973                                                     | 7116                   | 717                                    | 775                                   |
| CRBM.07  | FLX                  | 37360                                                | 229 ( $\pm$ 37)                                   | 12032                                                     | 7789                   | 831                                    | 1010                                  |
| CRBM.08  | FLX                  | 50597                                                | 229 ( $\pm$ 39)                                   | 16129                                                     | 10818                  | 1256                                   | 1421                                  |
| CRBM.09  | FLX                  | 40147                                                | 219 ( $\pm$ 51)                                   | 12690                                                     | 8484                   | 991                                    | 1139                                  |
| CRBM.10  | FLX                  | 47895                                                | 233 ( $\pm$ 36)                                   | 15895                                                     | 10502                  | 1217                                   | 1338                                  |
| CRBM.11  | FLX                  | 46573                                                | 226 ( $\pm$ 39)                                   | 16159                                                     | 10507                  | 1101                                   | 1410                                  |
| CRBM.12  | FLX                  | 40883                                                | 228 ( $\pm$ 37)                                   | 12931                                                     | 8533                   | 914                                    | 836                                   |
| CRBM.13  | FLX                  | 55303                                                | 229 ( $\pm$ 36)                                   | 19975                                                     | 13048                  | 1244                                   | 1500                                  |
| CRBM.14  | FLX                  | 65833                                                | 221 ( $\pm$ 43)                                   | 22484                                                     | 15038                  | 1576                                   | 1809                                  |
| CRBM.15  | FLX                  | 44298                                                | 222 ( $\pm$ 51)                                   | 13150                                                     | 8795                   | 875                                    | 980                                   |
| CRBM.16  | FLX                  | 36113                                                | 230 ( $\pm$ 36)                                   | 11676                                                     | 7656                   | 797                                    | 1160                                  |
| CRBM.19  | FLX                  | 50444                                                | 220 ( $\pm$ 50)                                   | 15282                                                     | 10116                  | 1078                                   | 1281                                  |
| CRBM.20  | FLX                  | 57998                                                | 233 ( $\pm$ 34))                                  | 19511                                                     | 12663                  | 1260                                   | 1233                                  |
| CRBM.21  | FLX                  | 43107                                                | 233 ( $\pm$ 36)                                   | 13794                                                     | 8995                   | 996                                    | 1027                                  |

\*All reads assigned as Glycoside Hydrolase, Polysaccharide Lyase, or Carbohydrate Esterase

### Table S9.

Shotgun pyrosequencing datasets obtained from fecal DNA prepared from calorie restricted humans: statistics.



**Table S10A**

| <b>SampleID</b> | <b>Total number of reads<br/>with hit in nr (%)</b> | <b>Total number of reads<br/>with no hit (%)</b> |
|-----------------|-----------------------------------------------------|--------------------------------------------------|
| CRBM.02         | 42480 (91.3%)                                       | 4055 (8.7%)                                      |
| CRBM.03         | 84019 (91.2%)                                       | 8121 (8.8%)                                      |
| CRBM.04         | 32607 (91.3%)                                       | 3128 (8.8%)                                      |
| CRBM.05         | 138600 (90.9%)                                      | 13947 (9.1%)                                     |
| CRBM.06         | 30859 (91.3%)                                       | 2941 (8.7%)                                      |
| CRBM.07         | 34201 (91.5%)                                       | 3159 (8.5%)                                      |
| CRBM.08         | 47210 (93.3%)                                       | 3387 (6.7%)                                      |
| CRBM.09         | 36603 (91.2%)                                       | 3544 (8.8%)                                      |
| CRBM.10         | 44443 (92.8%)                                       | 3452 (7.2%)                                      |
| CRBM.11         | 43336 (93.1%)                                       | 3237 (7.0%)                                      |
| CRBM.12         | 37205 (91.0%)                                       | 3678 (9.0%)                                      |
| CRBM.13         | 51679 (93.5%)                                       | 3624 (6.6%)                                      |
| CRBM.14         | 60795 (92.4%)                                       | 5038 (7.7%)                                      |
| CRBM.15         | 40014 (90.3%)                                       | 4284 (9.7%)                                      |
| CRBM.16         | 33524 (92.8%)                                       | 2589 (7.2%)                                      |
| CRBM.19         | 45123 (89.5%)                                       | 5321 (10.5%)                                     |
| CRBM.20         | 53238 (91.8%)                                       | 4760 (8.2%)                                      |
| CRBM.21         | 39416 (91.4%)                                       | 3691 (8.6%)                                      |

**Table S10B**

| SampleID | Bacteria | Eukarya | Archaea | Viruses | Cellular Organism / Root | Not assigned |
|----------|----------|---------|---------|---------|--------------------------|--------------|
| CRBM.02  | 91.93%   | 0.89%   | ND      | ND      | 4.37%                    | 2.82%        |
| CRBM.03  | 87.31%   | 1.92%   | 0.018%  | ND      | 8.43%                    | 2.32%        |
| CRBM.04  | 89.26%   | 1.16%   | ND      | ND      | 5.98%                    | 3.60%        |
| CRBM.05  | 88.43%   | 2.07%   | 0.007%  | ND      | 7.80%                    | 1.70%        |
| CRBM.06  | 87.71%   | 1.53%   | 0.078%  | ND      | 6.51%                    | 4.16%        |
| CRBM.07  | 88.03%   | 1.35%   | 0.015%  | 0.015%  | 6.73%                    | 3.86%        |
| CRBM.08  | 91.87%   | 0.97%   | ND      | ND      | 4.66%                    | 2.50%        |
| CRBM.09  | 89.98%   | 0.82%   | 0.459%  | ND      | 5.71%                    | 3.03%        |
| CRBM.10  | 90.23%   | 1.24%   | ND      | ND      | 5.51%                    | 3.02%        |
| CRBM.11  | 92.74%   | 0.70%   | ND      | ND      | 3.94%                    | 2.62%        |
| CRBM.12  | 86.52%   | 1.56%   | ND      | ND      | 7.98%                    | 3.94%        |
| CRBM.13  | 90.32%   | 1.16%   | 0.010%  | 0.010%  | 5.71%                    | 2.79%        |
| CRBM.14  | 92.06%   | 1.19%   | ND      | ND      | 4.43%                    | 2.32%        |
| CRBM.15  | 89.67%   | 1.00%   | 1.242%  | ND      | 5.00%                    | 3.09%        |
| CRBM.16  | 91.83%   | 0.78%   | ND      | ND      | 4.30%                    | 3.10%        |
| CRBM.19  | 89.32%   | 1.45%   | ND      | ND      | 5.99%                    | 3.24%        |
| CRBM.20  | 88.49%   | 1.91%   | 0.009%  | ND      | 6.64%                    | 2.95%        |
| CRBM.21  | 90.71%   | 1.17%   | ND      | ND      | 4.74%                    | 3.38%        |

"ND" = No reads detected in this taxonomic branch

**Table S10.**

Shotgun pyrosequencing datasets obtained from fecal DNA prepared from calorie restricted humans: phylogenetic assignments. (A) Summary of total hits against the NCBI non-redundant (nr) database. (B) Percentage of all reads assigned to the major phylogenetic divisions (normalized to total number of reads with hit in NCBI nr database).

| <i>Comparison</i>                     |                                 | <i>Regression Results</i> |              |                |                                      |           |                    |                    |
|---------------------------------------|---------------------------------|---------------------------|--------------|----------------|--------------------------------------|-----------|--------------------|--------------------|
| <b>Principal Coordinates Category</b> | <b>Diet Category</b>            | <b>Intercept</b>          | <b>Slope</b> | <b>P-Value</b> | <b>Adjusted P-Value (Bonferroni)</b> | <b>R2</b> | <b>Adjusted R2</b> | <b>F-Statistic</b> |
| 16S rRNA OTU Counts (Bray-Curtis)     | Total Carbohydrate (g/day)      | 0.239                     | -0.001       | 0.045          | 0.136                                | 0.23      | 0.18               | 4.72               |
| 16S rRNA OTU Counts (Bray-Curtis)     | Total Protein (g/day)           | 0.152                     | -0.002       | 0.233          | 0.699                                | 0.09      | 0.03               | 1.54               |
| 16S rRNA OTU Counts (Bray-Curtis)     | Insoluble Dietary Fiber (g/day) | 0.218                     | -0.006       | 0.004          | 0.013                                | 0.41      | 0.37               | 11.02              |
| 16S rRNA (Weighted UniFrac)           | Total Carbohydrate (g/day)      | -0.023                    | 0.000        | 0.741          | 2.223                                | 0.01      | -0.06              | 0.11               |
| 16S rRNA (Weighted UniFrac)           | Total Protein (g/day)           | -0.059                    | 0.001        | 0.410          | 1.230                                | 0.04      | -0.02              | 0.72               |
| 16S rRNA (Weighted UniFrac)           | Insoluble Dietary Fiber (g/day) | -0.033                    | 0.001        | 0.493          | 1.480                                | 0.03      | -0.03              | 0.49               |
| 16S rRNA (Unweighted UniFrac)         | Total Carbohydrate (g/day)      | 0.064                     | 0.000        | 0.575          | 1.724                                | 0.02      | -0.04              | 0.33               |
| 16S rRNA (Unweighted UniFrac)         | Total Protein (g/day)           | 0.019                     | 0.000        | 0.869          | 2.608                                | 0.00      | -0.06              | 0.03               |
| 16S rRNA (Unweighted UniFrac)         | Insoluble Dietary Fiber (g/day) | 0.084                     | -0.002       | 0.270          | 0.809                                | 0.08      | 0.02               | 1.31               |
| KO                                    | Total Carbohydrate (g/day)      | -0.012                    | 0.000        | 0.778          | 2.333                                | 0.01      | -0.06              | 0.08               |
| KO                                    | Total Protein (g/day)           | -0.103                    | 0.001        | 0.010          | 0.030                                | 0.35      | 0.31               | 8.52               |
| KO                                    | Insoluble Dietary Fiber (g/day) | -0.041                    | 0.001        | 0.156          | 0.469                                | 0.12      | 0.07               | 2.21               |

**Table S11.**

Results of regression analysis comparing position on Principal Coordinate 1 with host dietary intake.
